# Supplementary material for: Trends in body-mass index and obesity in urban and rural China: findings from consecutive nationally representative surveys during 2004-2018
Source: PubMed Central journal article supplement (PMC7617101; doi:10.1016/s0140-6736(21)00798-4), 2021-07-03
Supplement: EMS201458-supplement-Appendix.pdf [file EMS201458-supplement-Appendix.pdf]

# THE LANCET

## Supplementary appendix

This appendix formed part of the original submission and has been peer reviewed.  
We post it as supplied by the authors.

Supplement to: Wang L, Zhou B, Zhao Z, et al. Body-mass index and obesity in urban and rural China: findings from consecutive nationally representative surveys during 2004-18. *Lancet* 2021; **398**: 53-63.

## **Appendix**

**Trends in body-mass index and obesity in urban and rural China: findings from consecutive nationally representative surveys during 2004-2018, by Limin Wang, et al.**

## Table of contents

|                                                                                                                                                                                                                                            |    |
|--------------------------------------------------------------------------------------------------------------------------------------------------------------------------------------------------------------------------------------------|----|
| Appendix 1. Sample design of CCDRFS.....                                                                                                                                                                                                   | 3  |
| Appendix 2. Data collection of CCDRFS.....                                                                                                                                                                                                 | 6  |
| Appendix 3. Analysis plan.....                                                                                                                                                                                                             | 7  |
| Appendix Figure 1. Trends in standardised mean height from 2004 to 2018, by sex and urban-rural locality.....                                                                                                                              | 10 |
| Appendix Figure 2. Change in BMI distribution from 2004 to 2018, by sex and urban-rural locality.....                                                                                                                                      | 11 |
| Appendix Figure 3. Trends in standard deviation of BMI from 2004 to 2018, by sex and urban-rural locality. ...                                                                                                                             | 12 |
| Appendix Figure 4. Trends in standardised prevalence of obesity from 2004 to 2018 in (A) urban and (B) rural areas, by sex and age group. ....                                                                                             | 13 |
| Appendix Figure 5. Trends in standardised prevalence of obesity from 2004 to 2018 in (A) urban and (B) rural areas, by sex and education.....                                                                                              | 14 |
| Appendix Figure 6. Trends in standardised mean BMI from 2004 to 2018 in (A) urban and (B) rural areas, by sex and occupation. ....                                                                                                         | 15 |
| Appendix Figure 7. Trends in standardised prevalence of obesity from 2004 to 2018 in (A) urban and (B) rural areas, by sex and occupation.....                                                                                             | 16 |
| Appendix Figure 8. Trends in standardised mean BMI from 2004 to 2018 in (A) urban and (B) rural areas, by sex and region.....                                                                                                              | 17 |
| Appendix Figure 9. Trends in standardised prevalence of obesity from 2004 to 2018 in (A) urban and (B) rural areas, by sex and region.....                                                                                                 | 18 |
| Appendix Figure 10. Trends in mean BMI and prevalence of obesity and overweight from 2004-2018, using data from DSPs that have been included in all survey rounds, by sex and urban-rural locality. ....                                   | 19 |
| Appendix Table 1. Standardised mean BMI, prevalence of obesity and prevalence of overweight.....                                                                                                                                           | 20 |
| Appendix Table 2. Annual change in standardised mean BMI, prevalence of obesity and prevalence of overweight from 2004 to 2010 and from 2010 to 2018 in different age groups, education levels, occupation groups and regions, by sex..... | 22 |
| Appendix Table 3. Standardised prevalence of obesity and overweight defined by Chinese BMI cut-offs (obesity: BMI $\geq 28$ and overweight: $\geq 24$ kg/m <sup>2</sup> ). ....                                                            | 31 |
| Appendix Table 4. Annual change in standardised prevalence of obesity and overweight defined by Chinese BMI cut-offs (obesity: BMI $\geq 28$ and overweight: $\geq 24$ kg/m <sup>2</sup> ) in 2004-2010 and in 2010-2018. ....             | 32 |

## **Appendix 1. Sample design of CCDRFS.**

### **Overview**

The sample of CCDRFS was obtained from China's national Disease Surveillance Point (DSP) system.<sup>1</sup> One DSP unit covers a rural county or an urban district. The DSPs were established during early 1980s, using multi-stage stratified sampling with probability proportional to size (PPS) to ensure representativeness of the national population of mainland China. Following further expansion and sampling enhancement, from the 2013 survey the selected DSPs were also representative at provincial level. CCDRFS is planned and administrated by the National Center for Chronic and Non-communicable Disease Control and Prevention (NCNCD) of the Chinese Center for Disease Control and Prevention (CDC).

### **Disease Surveillance Point (DSP)**

The DSP system was piloted in 1978 and fully established in early 1980s covering initially 71 sites, expanding to 145 in 1989 and 161 DSPs in 2004 (covering a population of 73 million), in order to accommodate the societal and economic development during this period. For each expansion, the population characteristics of the selected DSPs were compared to the census population to ensure its nationally representativeness.<sup>2,3</sup> In 2013, the Chinese government combined the DSP system with the national vital registration system to form an integrated national mortality surveillance system, which increased the DSP areas from 161 to 605. The DSPs system currently covers 324 million Chinese adults (24% of all Chinese population) in the mainland of China.

### **Sampling procedure**

Embedded within the DSP system, the CCDRFS used stratified multi-stage cluster sampling to generate a nationally representative sample for each survey.

In the first stage, half of the DSPs were selected as primary sampling units (PSUs) using stratified sampling (in the surveys of 2004, 2013, 2015 and 2018), or all DSPs were selected as PSUs (in the surveys of 2007 and 2010). Since the 2013 survey, following the expansion of the DSP system, 298 DSPs were selected from all 605 DSPs to generate a sample representative of both the national and provincial population in the 31 provinces of mainland China. The sampling of DSPs was done centrally by the NCNCD.

Then, within each selected DSP, the following steps were followed:

1. Townships (rural) or subdistricts (urban) were selected with PPS sampling in each selected DSP.
2. Within the selected townships and subdistricts, villages (rural) or residential areas (urban) were selected with PPS sampling.
3. Each selected village or residential area was divided into groups of about 50 households, based on existing villager/resident groups in the village or residential area. One group was selected with simple random sampling.
4. Within each selected household, in the 2004 survey, one eligible adult whose day of birth was closest to the 21st was invited. In the surveys of 2007, 2010, and 2013, the Kish method was used to select one eligible adult. In the 2015 and 2018 surveys, all eligible adults in the household were invited.

Eligibility criteria include:

- a. Aged 18 years or older;

- b. Having lived in the address for more than 6 months in the past 12 months;
  - c. Not pregnant;
  - d. Not having a serious health condition or illness that prevents from participating, including intellectual disability or language disorder.
5. In a household, if the selected eligible adult (the surveys of 2004, 2007, 2010, and 2013), or more than half of the family's eligible members (the 2015 and 2018 surveys) refused to participate or were not reachable, a replacement household with similar sex and age structure was selected. In each round, <10% households were replaced.

For surveys between 2004 and 2013, the sampling within selected DSP, as described above, was conducted by the NCNCD centrally; since the 2015 survey, the sampling was performed by the provincial CDCs and approved by the NCNCD.

### Sample size calculation

Sample size of each round of CCDRFS was calculated using  $N = deff \frac{u^2 p(1-p)}{d^2}$

where  $u = 1.96$  (corresponding to 95% confidence level),  $deff$  is design efficiency (1.5 to 3.5),  $r$  is relative error (20%), and  $d = r \times p$ .  $p$  is the prevalence of factor studied for calculation. By using diabetes prevalence from previous national surveys (7-10%), the table below shows the calculated target sample sizes in each survey.

| Survey             | 2004   | 2007   | 2010   | 2013    | 2015    | 2018    |
|--------------------|--------|--------|--------|---------|---------|---------|
| Target sample size | 33,180 | 52,020 | 96,870 | 175,485 | 182,376 | 183,813 |

### Sample weights

Across all CCDRFS surveys, we developed sample weights to account for multi-stage sampling design, post-stratification and, for the 2015 and 2018 surveys only, non-response within household as all members were selected. For an individual in the sample, his/her sample weights were developed as follows.

#### 1. Base weights for multi-stage design ( $W_{design}$ )

$$W_{design} = W_{d1} \times W_{d2} \times W_{d3} \times W_{d4} \times W_{d5} \times W_{d6}$$

- $W_{d1}$  is the total number of counties (rural) or districts (urban) in the stratum divided by the number of selected DSPs (PSU) in the stratum where the individual was from;
- $W_{d2}$  is the total number of townships (rural) or subdistricts (urban) in the PSU where the individual belonged divided by the number of selected townships or subdistricts;
- $W_{d3}$  is the total number of villages (rural) or residential areas (urban) in the township or subdistrict where the individual was from divided by the number of selected villages or residential areas;
- $W_{d4}$  is the total number of groups in the village or residential area where the individual was from;
- $W_{d5}$  is the total number of households in the group where the individual belonged divided by the number of selected households in the group where the individual was from.
- $W_{d6}$  is the total number of eligible adults in the household where the individual was from (2013 or earlier) or 1 (since 2015).

2. Non-response weights (Wnr) in the 2015 and 2018 surveys

Wnr = the number of eligible adults in the household where the individual was from divided by the number of participating adults in the household.

3. Post-stratification weights (Wps)

Stratifications included: province (31 levels), urban or rural (2 levels), gender (2 levels), age group (10 levels: 18-24, 25-29, 30-34, 35-39, 40-44, 45-49, 50-54, 55-59, 60-64, 65-69). The 2010 census population was also stratified in the same way. In k<sup>th</sup> stratum, the post-stratification weights (Wps,k) are:

$$W_{ps,k} = \frac{\text{Population in the } k^{\text{th}} \text{ stratum of the 2010 census population}}{\text{Sum of } W_{\text{design}} \times W_{\text{nr}} \text{ for all individuals in the } k^{\text{th}} \text{ stratum}}$$

## **Appendix 2. Data collection of CCDRFS.**

### **Overview**

CCDRFS field work was coordinated by the NCNCD and implemented by the local CDCs. All field work staff received mandatory training provided by certified instructors from the NCNCD and hosted by provincial CDCs.

The field work in each round of survey started in August, and in most rounds, finished in the same year. In 2013, 2015 and 2018, remaining visits were completed by June of the next year. Trained interviewers from local CDCs carried out the face-to-face interview, physical measurement, and biochemical sample collection and pre-treatment. Interview was conducted during a home visit. Physical measurement and biochemical sample collection were arranged at a community health centre.

### **Home visits**

During home visit, the head of household or an adult who knew well the details of the household (e.g., economic and environmental information) was interviewed first using the household questionnaire that assessed the eligibility of all household members. Then, all eligible subjects were given a personal questionnaire that covered demographic characteristics, lifestyle factors, and history of chronic diseases. At the end of the home visit, the investigator gave each subject an appointment letter, instructing the location, time and precautions of the physical measurements.

### **Physical measurements**

All subjects were invited to a community health centre to attend a physical measurement session. Subjects who did not complete their personal interviews during home visits also completed their interviews in the service centre. Weight and height were measured using a standard protocol (Appendix Table 1).

### **Data management**

From 2004 to 2013, all data were recorded on paper questionnaires first, and then entered into computer via a bespoke data management system, and delivered to the NCNCD via email or an online data transfer system. All the data entry and processing were done by the local CDCs, except in 2007 when the data entry was outsourced to a company. Since 2015, NCNCD deployed an integrated platform consisting of a tablet-assisted interview system and an online information management system, which was adopted by all local CDCs. The data of the questionnaire and physical measurement was collected electronically using the tablet-assisted system. The internet-based information management system was used to generate samples (as described in Appendix 1), on-site identity confirmation, quality control, physical examination reports, and data download.

### Appendix 3. Analysis plan.

The aim of the analysis is to describe the trends from 2004 to 2018 in mean BMI and prevalence of obesity and overweight in China by subgroups of population, and examine how the trends may have changed before and after 2010.

#### Study participants

Men and women aged 18-69 years

#### Main outcomes

Mean BMI, prevalence of obesity (BMI  $\geq 30$  kg/m<sup>2</sup>), prevalence of overweight (BMI  $\geq 25$  kg/m<sup>2</sup>)

#### Secondary outcomes

Prevalence of obesity by Chinese cut-off points (BMI  $\geq 28$  kg/m<sup>2</sup>), prevalence of overweight by Chinese cut-off points (BMI  $\geq 24$  kg/m<sup>2</sup>)

#### Stratification

**Sex** (male, female), **age** (18-29, 30-39, 40-49, 50-59, 60-69 years), **locality of residence** (rural, urban), **education** (no education, primary, secondary, college), **region** (East, South, North, Central, Northeast, Southwest, Northwest), **occupation** (agriculture related, other manual work, non-manual work, not working, retired)

Interactions of grouping are limited to sex and place of residence plus one other group.

#### Statistics

Outcome (main and secondary) levels, overall and in groups as defined in ‘Stratification’.

- SAS is used to account for clustering, stratification and sample weights in the sample design.
- Standard error and 95% confidence interval are estimated using *proc surveymeans* procedure in SAS, which uses Taylor series linearisation and accounts for finite population correction.<sup>4</sup>

Change in outcome (main and secondary) levels from 2004 to 2010 and from 2010 to 2018, overall and in groups as defined in ‘Stratification’.

- Annual change in mean BMI (kg/m<sup>2</sup>):

$$\text{annual change} = \frac{(\text{level}_{t_2} - \text{level}_{t_1})}{(t_2 - t_1)}$$

- Annual relative change in prevalence of obesity and overweight:

$$\text{annual relative change} = \left( \frac{\text{level}_{t_2}}{\text{level}_{t_1}} \right)^{\frac{1}{t_2 - t_1}} - 1$$

95% confidence interval for the annual change in mean BMI is calculated using the Welch’s t-test. The statistical significance of the difference in the annual changes between 2004-2010 and 2010-2018 in mean BMI is also tested using the Welch’s t-test.



95% confidence interval for the annual relative change in prevalence of obesity and overweight is calculated using 100,000 simulations, drawing from independent binomial distributions decided by the prevalence and effective sample sizes (calculated via standard errors) at the beginning and the end years. It is reported as the 2.5<sup>th</sup> and 97.5<sup>th</sup> percentiles from the simulation. Statistical significance of the difference in the annual relative changes between 2004-2010 and 2010-2018 is also tested using the same simulation method.

### **Missing data**

Individuals with missing demographic information or height or weight measurements are excluded from the analyses.

## References

1. Yang G, Hu J, Rao KQ, Ma J, Rao C, Lopez AD. Mortality registration and surveillance in China: History, current situation and challenges. *Popul Health Metr* 2005; **3**: 3.
2. Yang G. [Selection of DSP points in second stage and their presentation]. *Zhonghua Liu Xing Bing Xue Za Zhi* 1992; **13**: 197-201.
3. Zhou MG, Jiang Y, Huang ZJ, Wu F. Adjustment and representativeness evaluation of national disease surveillance points system. *Dis Surveill* 2010; **25**: 239-44.
4. SAS Institute Inc. SAS/STAT® 14.3 User's Guide The SURVEYMEANS Procedure. SAS/STAT® 14.3 User's Guide. Cary, NC: SAS Institute Inc.; 2017.

**Appendix Figure 1. Trends in standardised mean height from 2004 to 2018, by sex and urban-rural locality.**

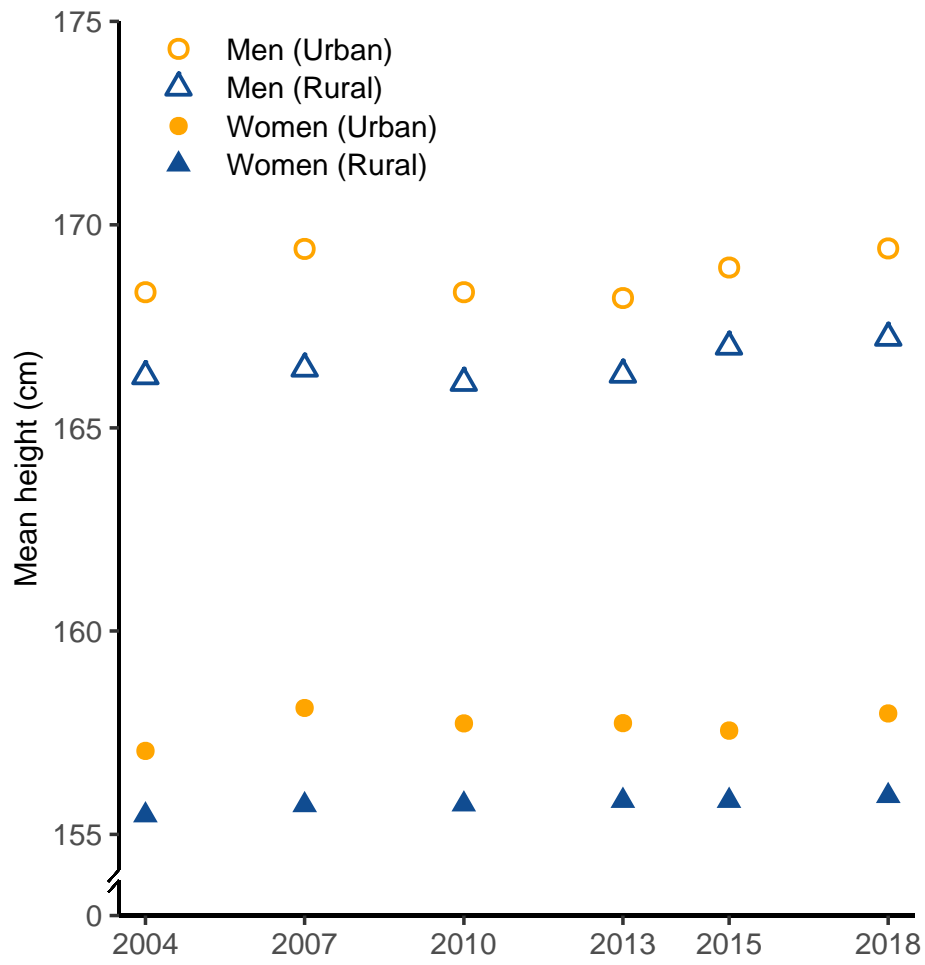

**Appendix Figure 2. Change in BMI distribution from 2004 to 2018, by sex and urban-rural locality.**

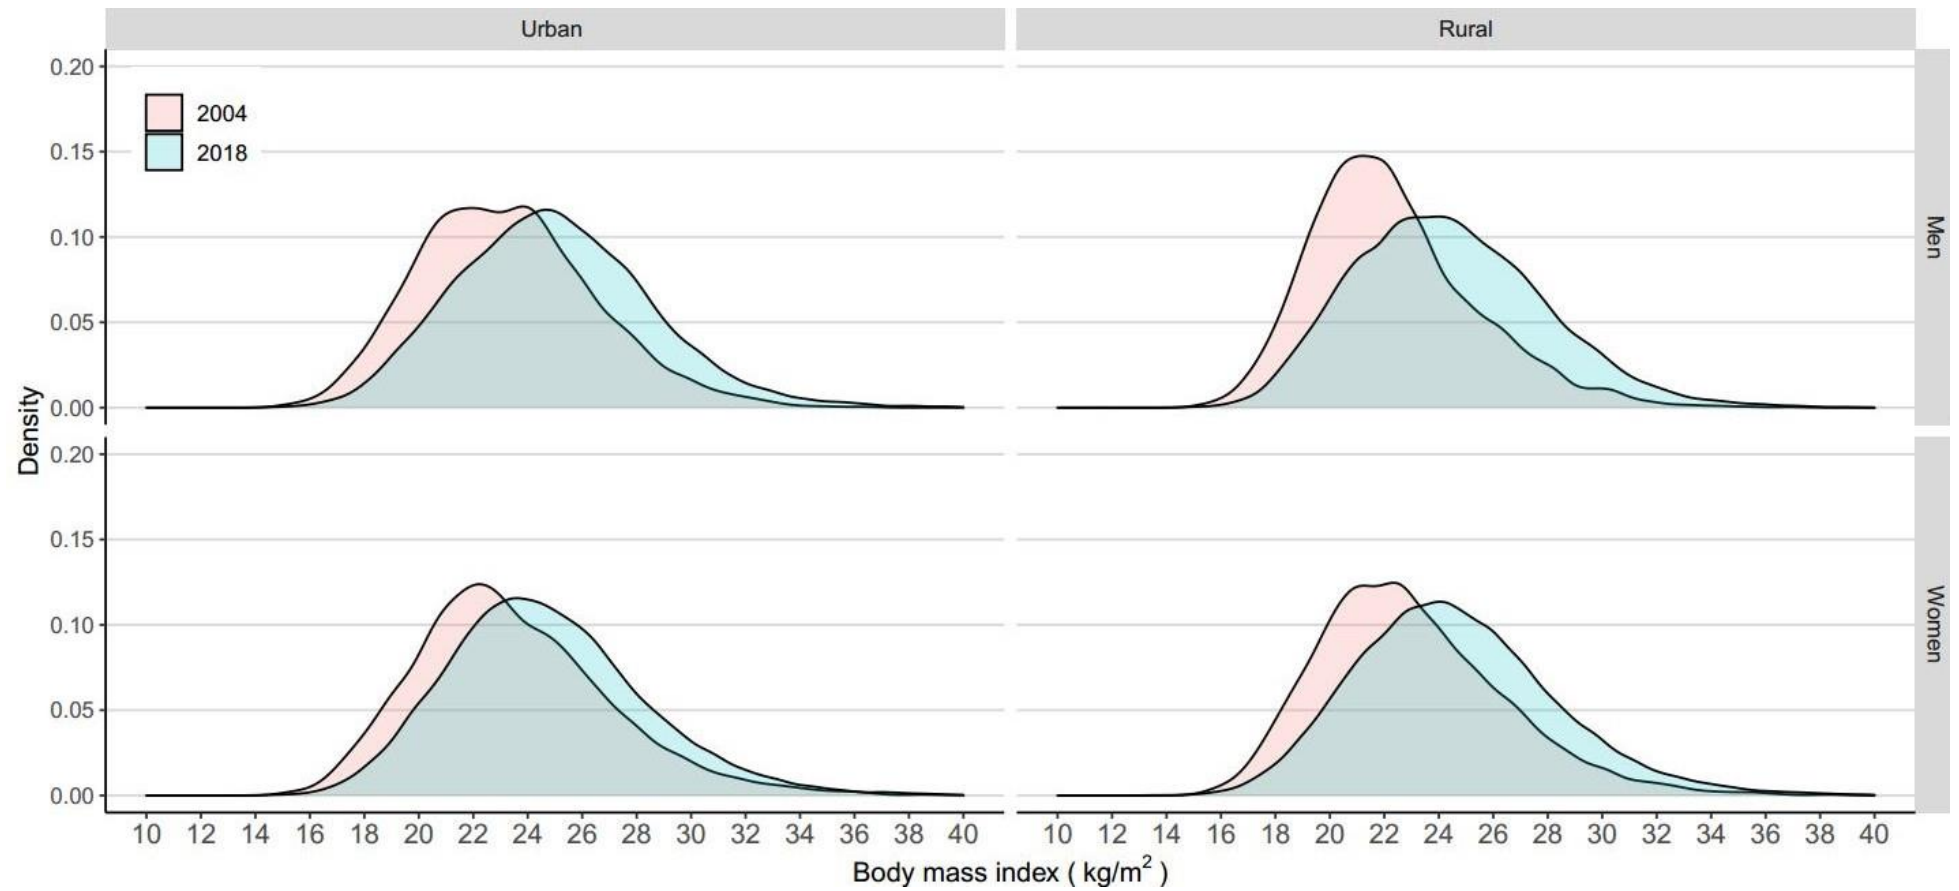

**Appendix Figure 3. Trends in standard deviation of BMI from 2004 to 2018, by sex and urban-rural locality.**

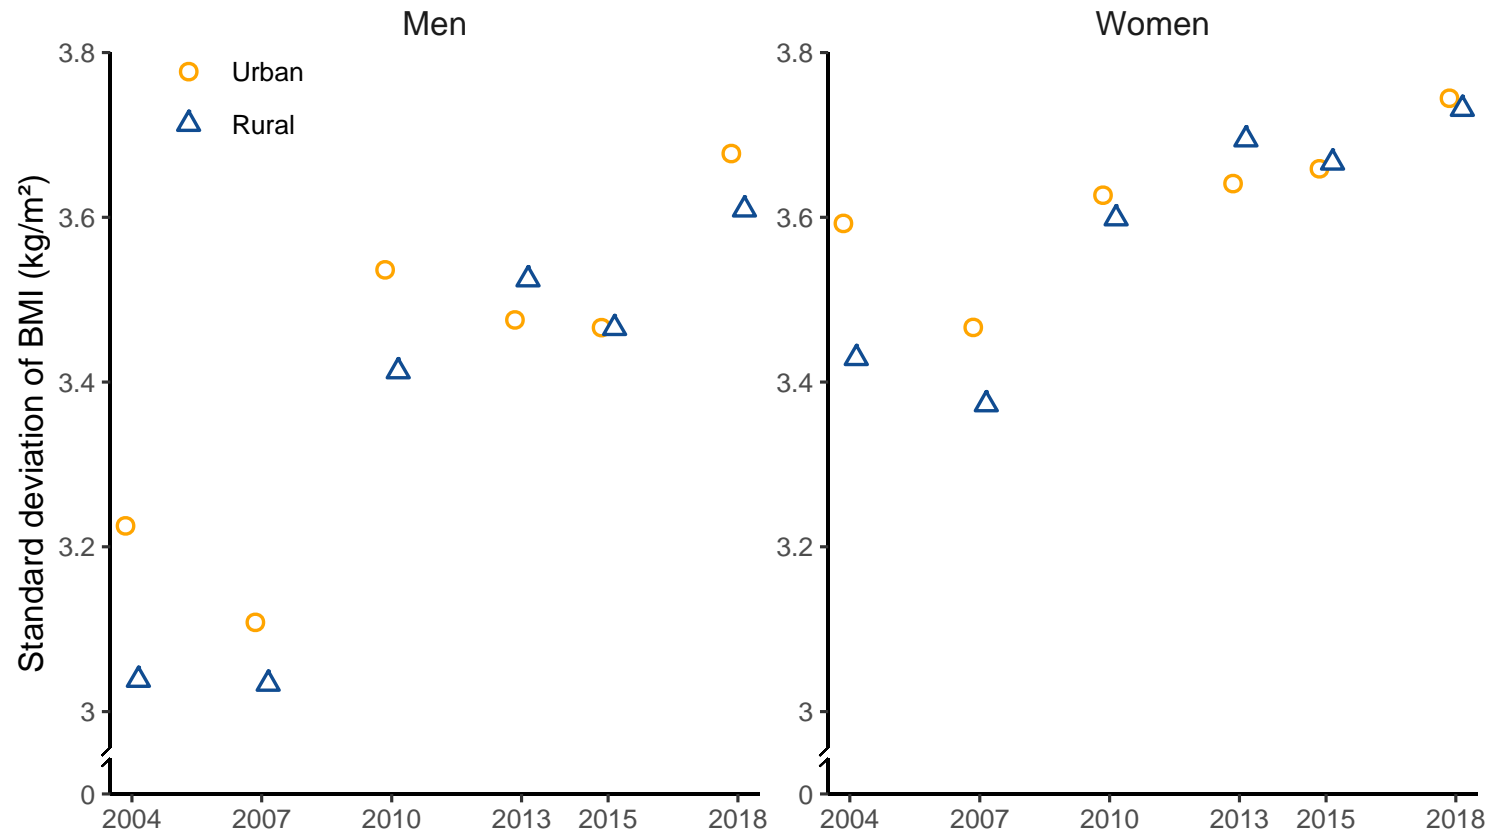

**Appendix Figure 4. Trends in standardised prevalence of obesity from 2004 to 2018 in (A) urban and (B) rural areas, by sex and age group.**

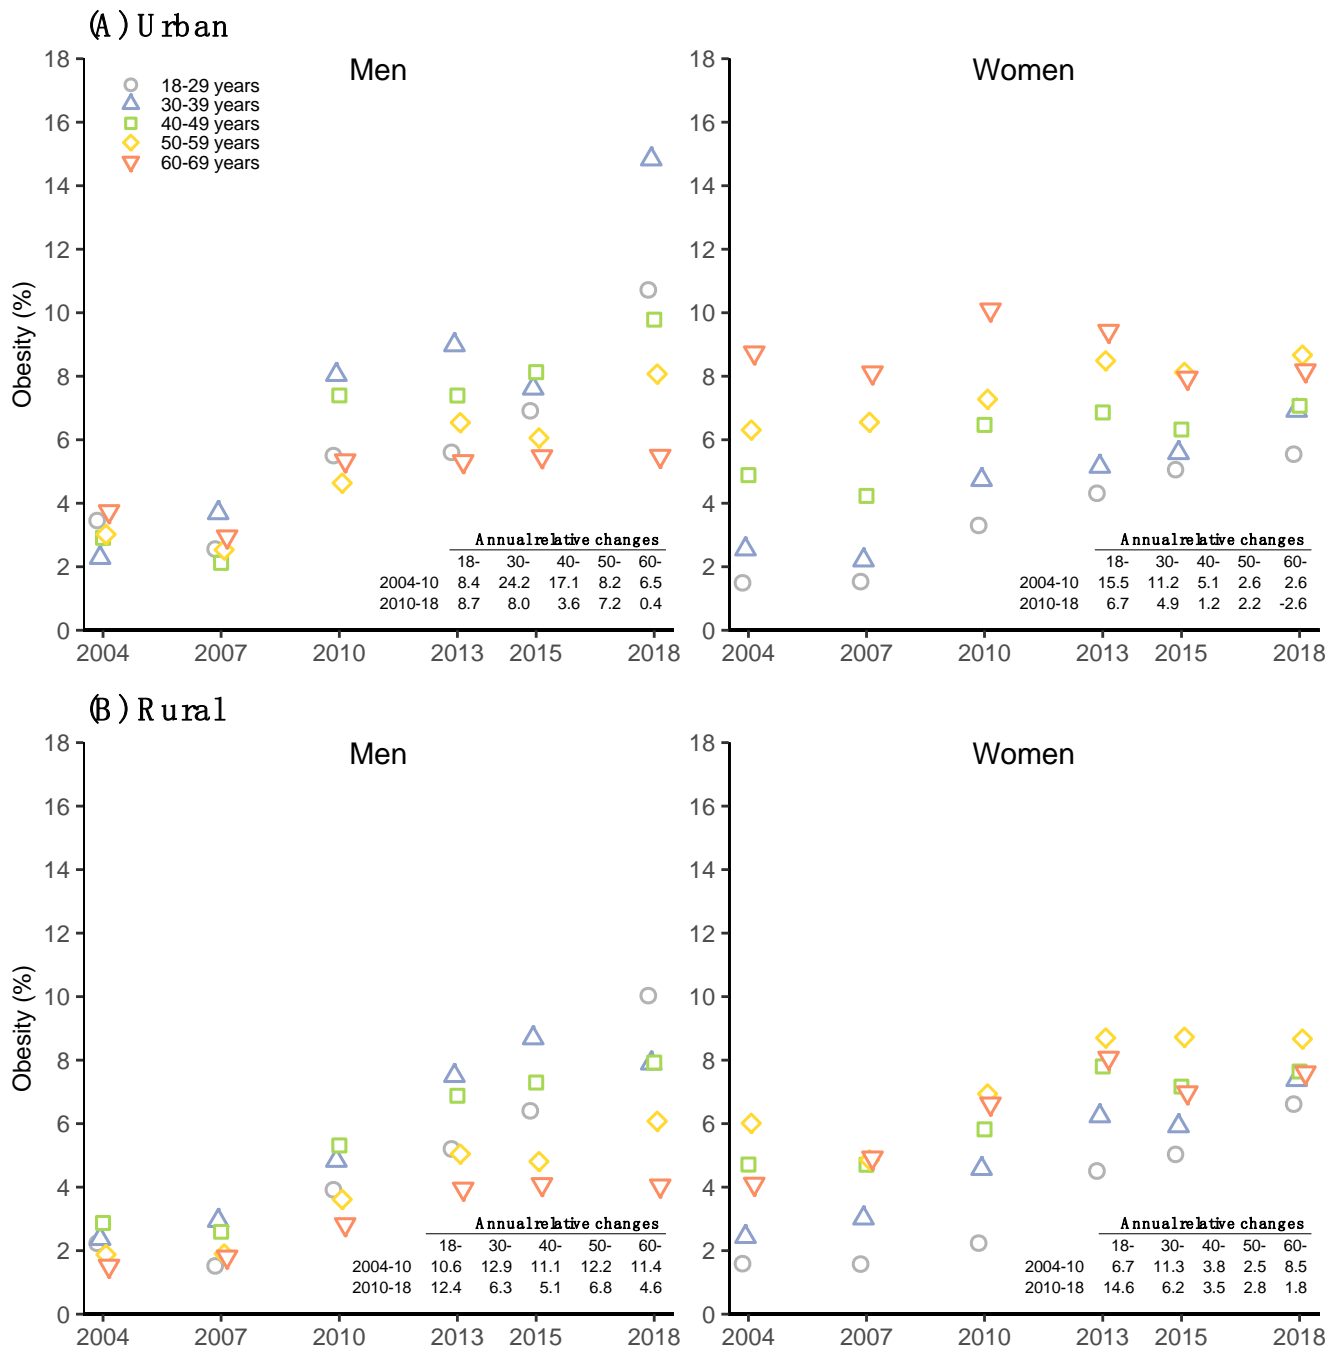

**Appendix Figure 5. Trends in standardised prevalence of obesity from 2004 to 2018 in (A) urban and (B) rural areas, by sex and education.**

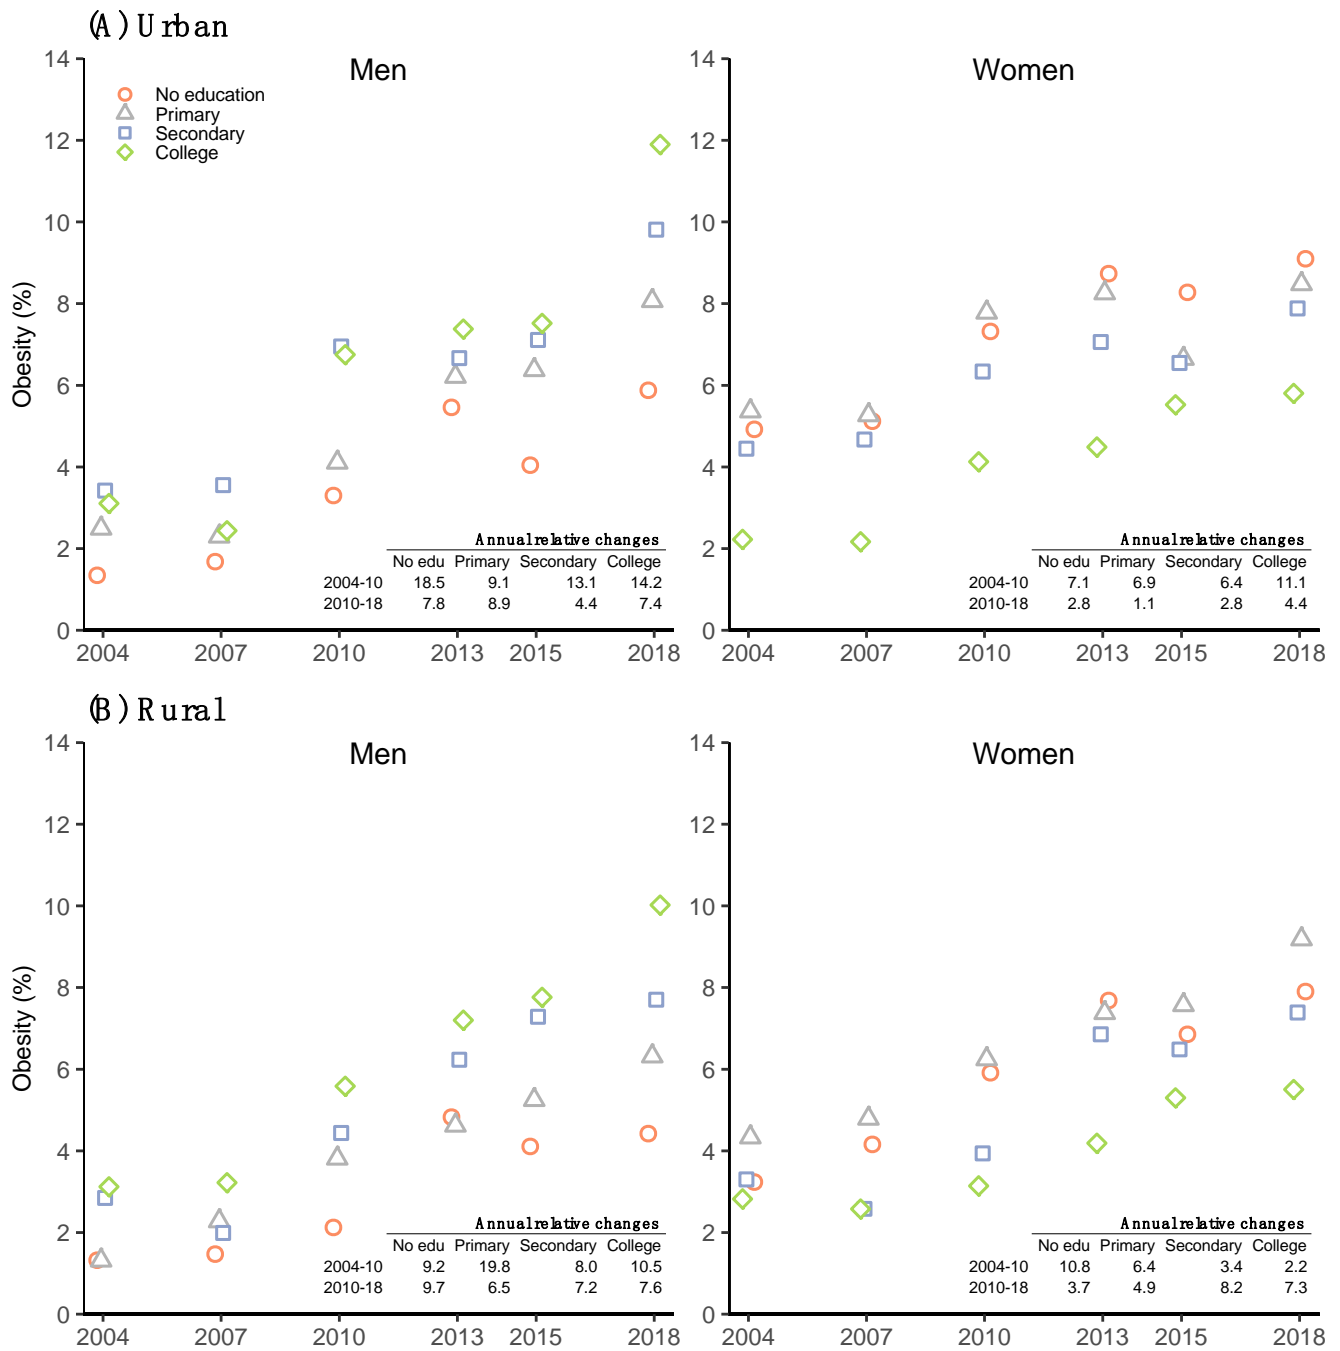

**Appendix Figure 6. Trends in standardised mean BMI from 2004 to 2018 in (A) urban and (B) rural areas, by sex and occupation.**

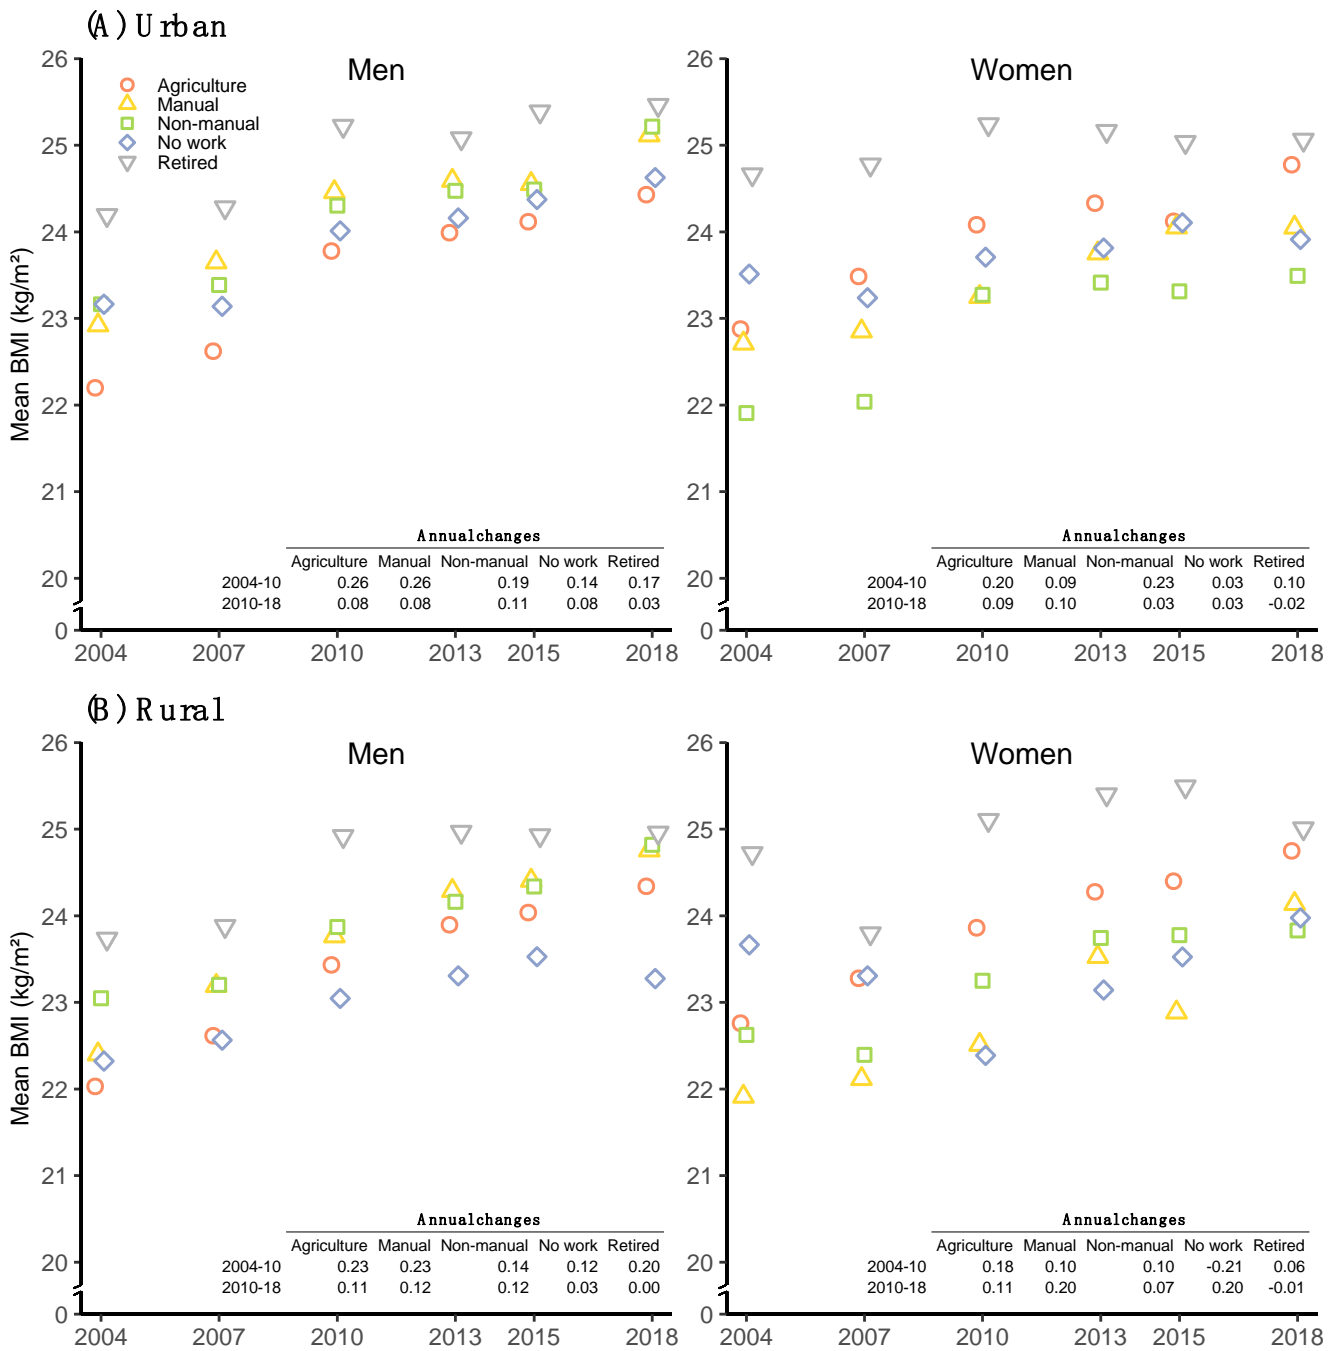



**Appendix Figure 7. Trends in standardised prevalence of obesity from 2004 to 2018 in (A) urban and (B) rural areas, by sex and occupation.**

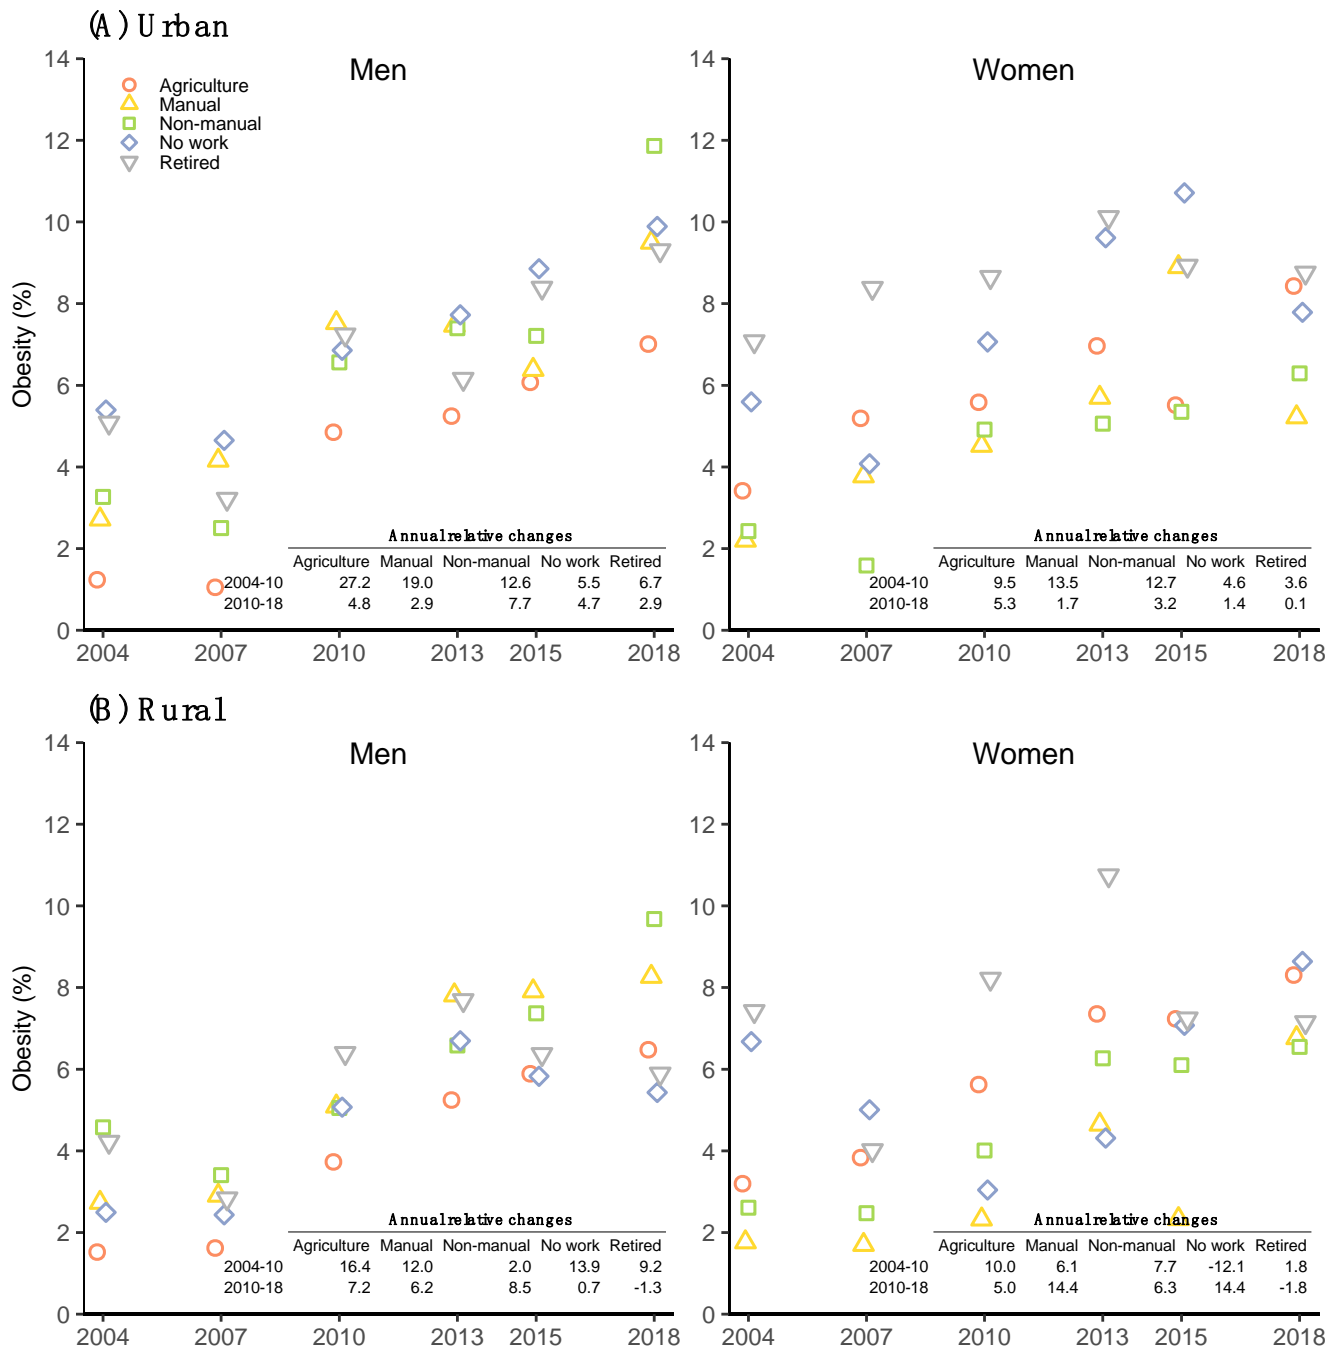

**Appendix Figure 8. Trends in standardised mean BMI from 2004 to 2018 in (A) urban and (B) rural areas, by sex and region.**

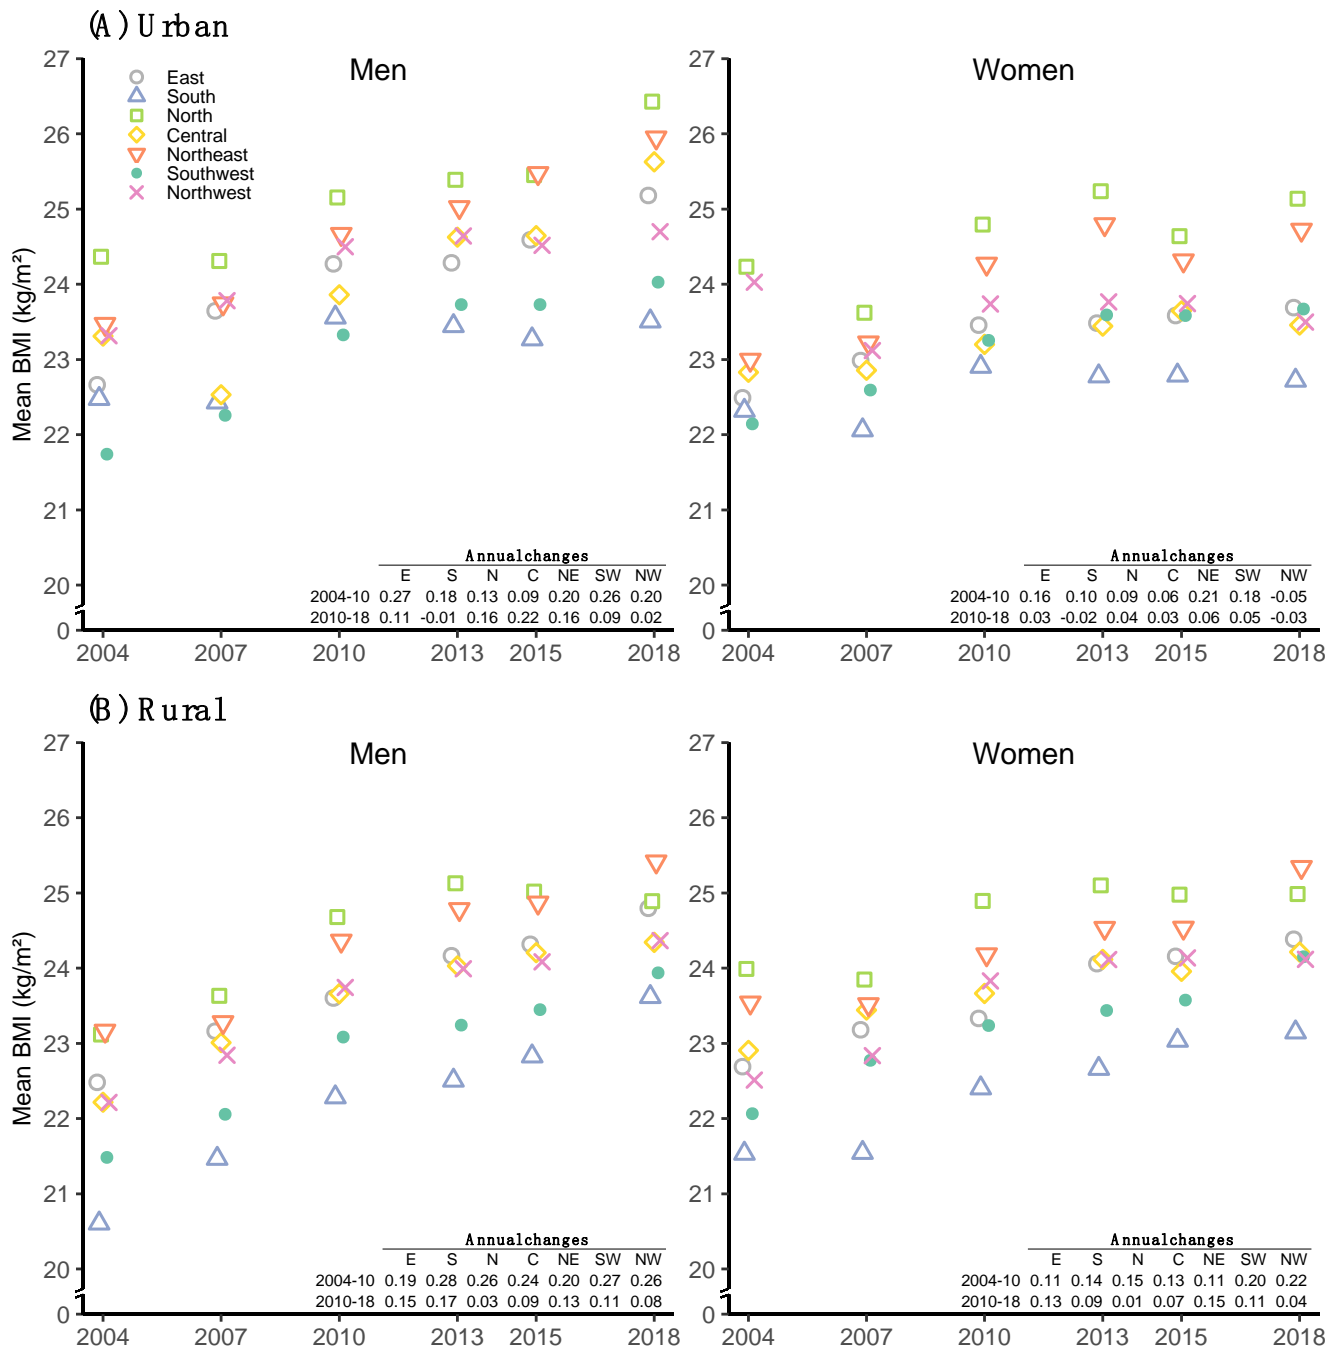

**Appendix Figure 9. Trends in standardised prevalence of obesity from 2004 to 2018 in (A) urban and (B) rural areas, by sex and region.**

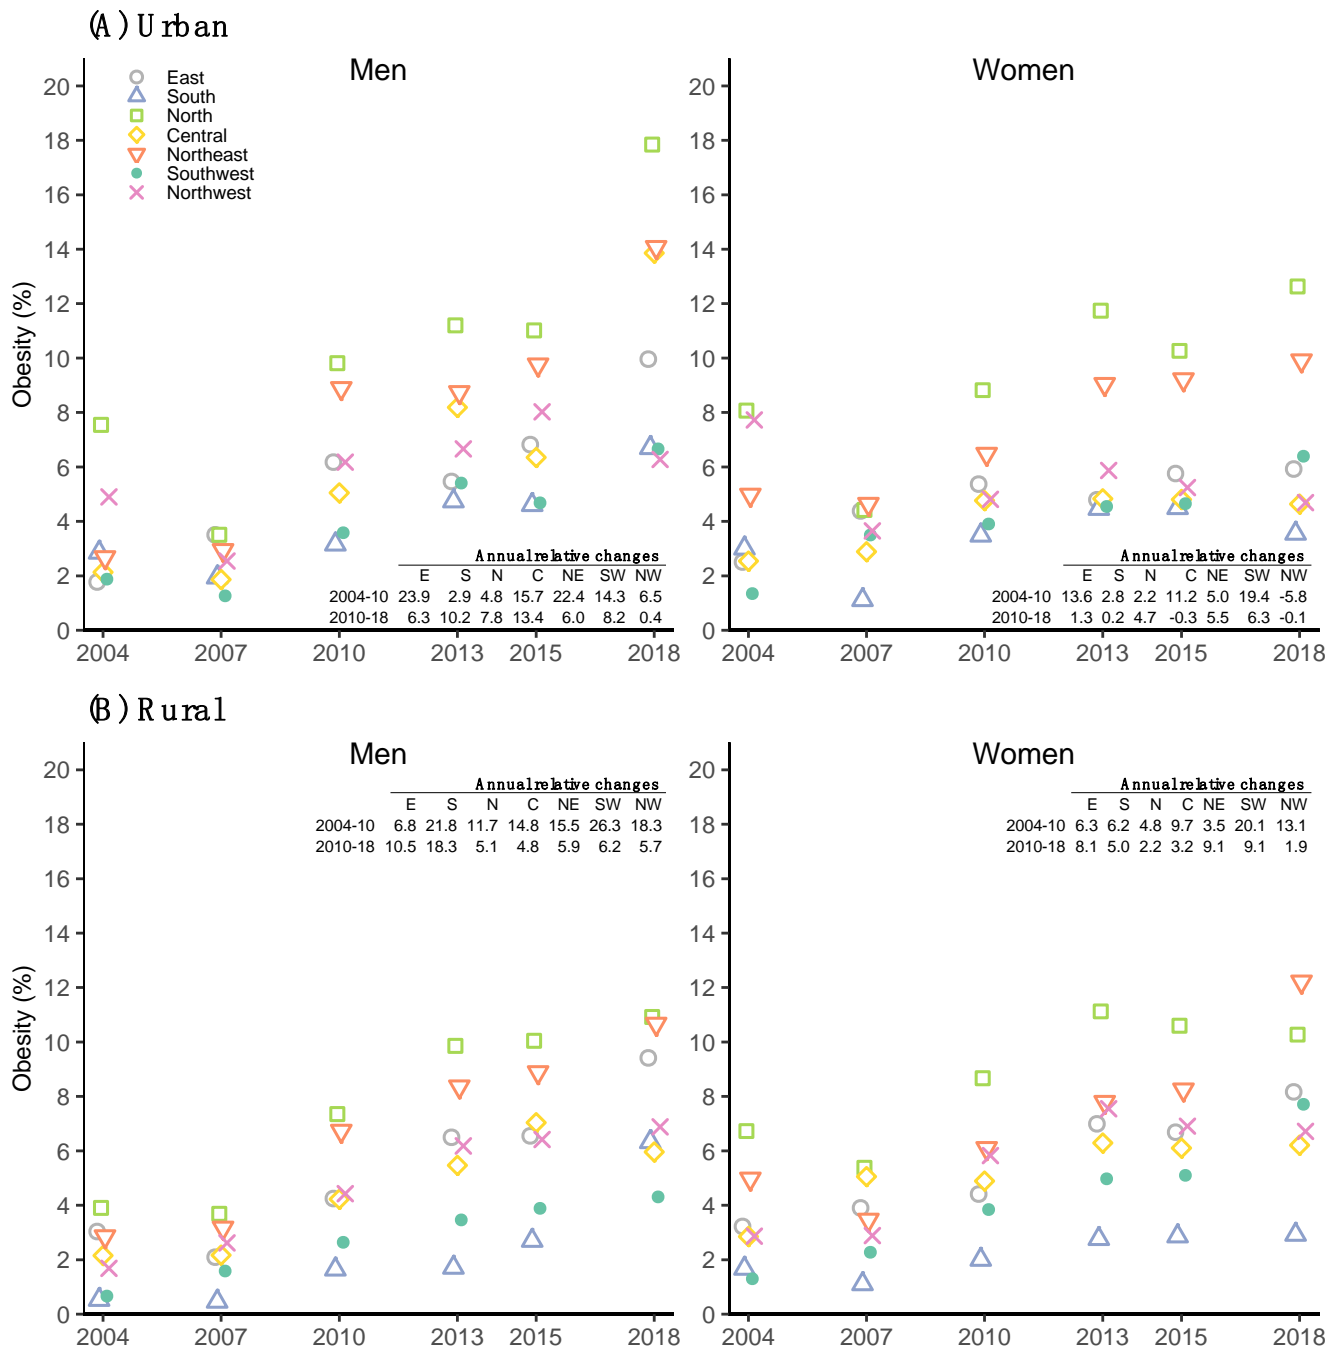

**Appendix Figure 10. Trends in mean BMI and prevalence of obesity and overweight from 2004-2018, using data from DSPs that have been included in all survey rounds, by sex and urban-rural locality.**

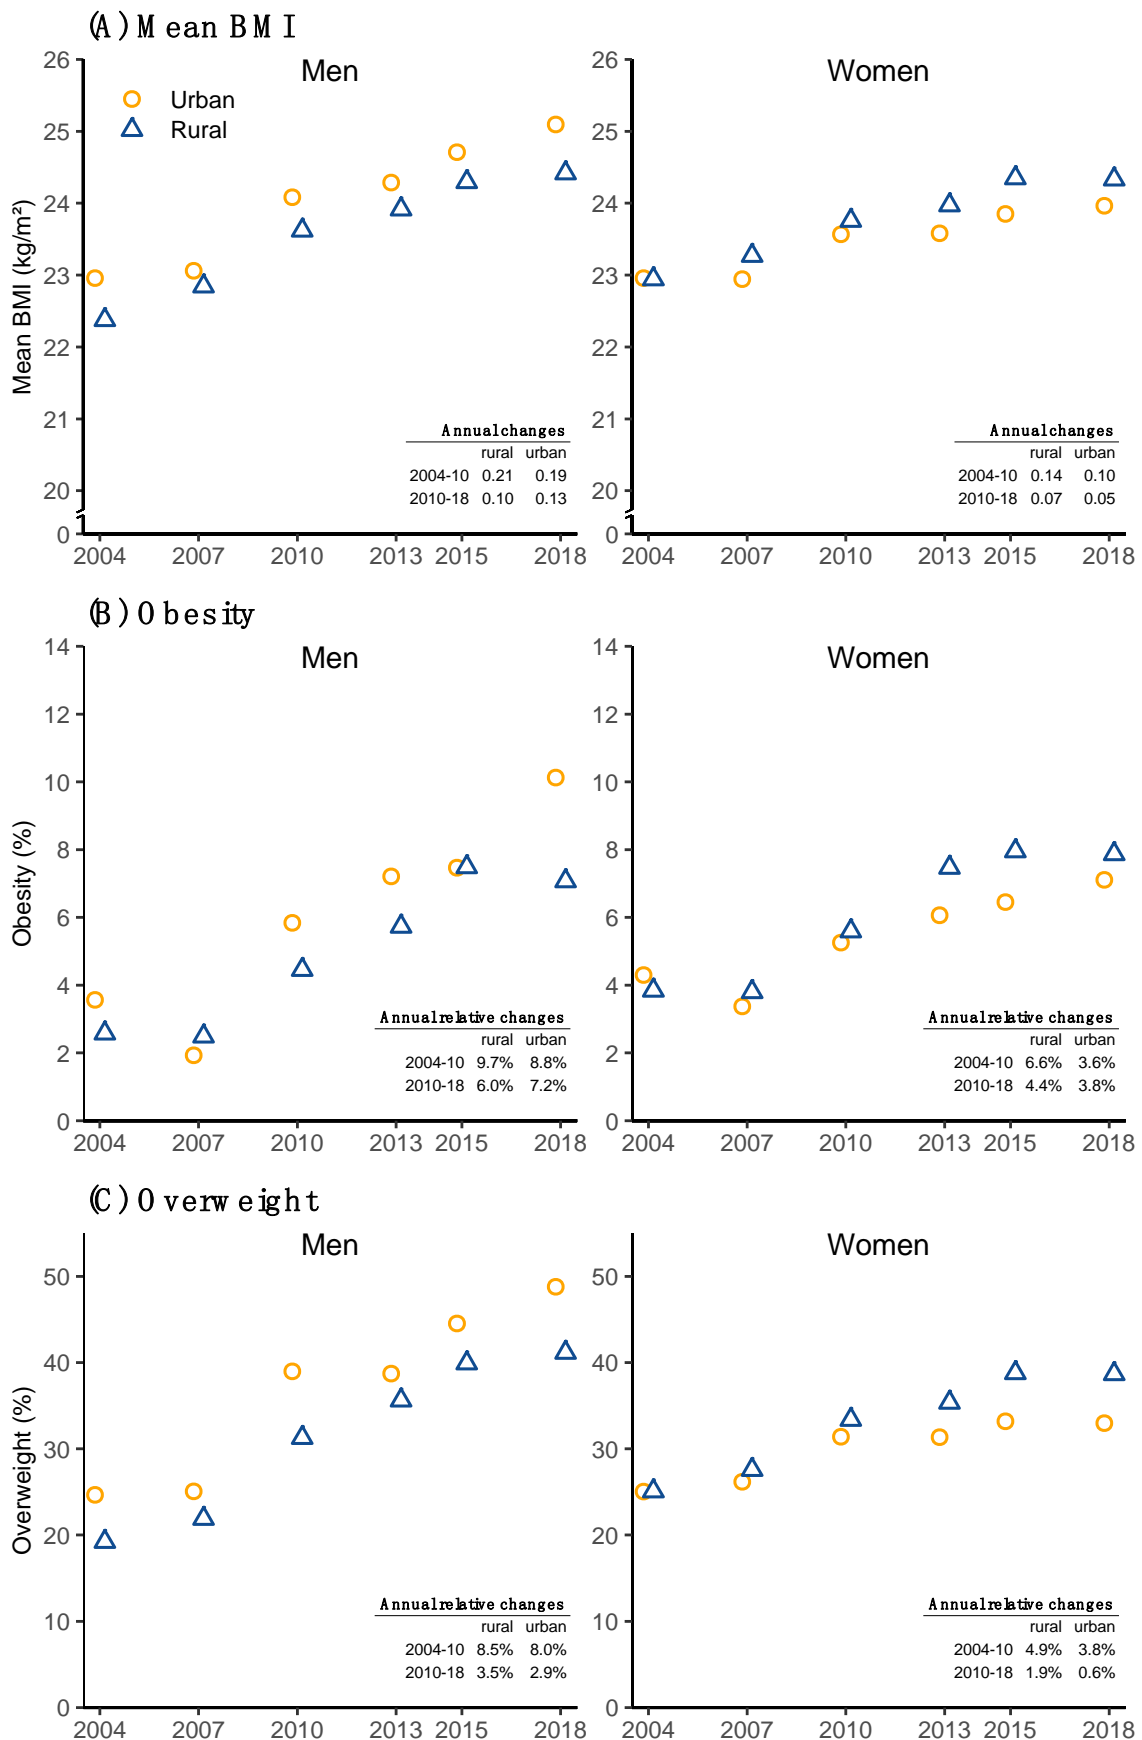

**Appendix Table 1. Standardised mean BMI, prevalence of obesity and prevalence of overweight.** See Appendix Table 3 for results using Chinese BMI cut-offs for obesity and overweight.

|                                                   | <b>2004</b>       | <b>2007</b>       | <b>2010</b>       | <b>2013</b>       | <b>2015</b>       | <b>2018</b>       |
|---------------------------------------------------|-------------------|-------------------|-------------------|-------------------|-------------------|-------------------|
| <b>Men</b>                                        |                   |                   |                   |                   |                   |                   |
| <b>Mean (&amp; 95%CI) BMI (kg/m<sup>2</sup>)</b>  |                   |                   |                   |                   |                   |                   |
| Overall                                           | 22.5 (22.3, 22.8) | 23.0 (22.8, 23.2) | 23.8 (23.7, 24.0) | 24.2 (24.0, 24.3) | 24.3 (24.1, 24.5) | 24.7 (24.6, 24.9) |
| Urban                                             | 23.0 (22.7, 23.2) | 23.3 (23.0, 23.6) | 24.2 (24.0, 24.5) | 24.4 (24.2, 24.6) | 24.5 (24.2, 24.8) | 25.1 (24.8, 25.3) |
| Rural                                             | 22.3 (21.9, 22.6) | 22.8 (22.6, 23.0) | 23.6 (23.4, 23.8) | 24.0 (23.8, 24.2) | 24.2 (23.9, 24.4) | 24.5 (24.3, 24.7) |
| <b>Prevalence (&amp; 95%CI) of obesity (%)</b>    |                   |                   |                   |                   |                   |                   |
| Overall                                           | 2.6 (2.0, 3.1)    | 2.4 (2.0, 2.8)    | 5.1 (4.5, 5.6)    | 6.3 (5.7, 6.9)    | 6.8 (6.2, 7.4)    | 9.0 (8.3, 9.7)    |
| Urban                                             | 3.0 (2.0, 4.0)    | 2.7 (2.1, 3.4)    | 6.4 (5.4, 7.3)    | 6.9 (6.0, 7.8)    | 7.1 (6.3, 7.9)    | 10.6 (9.4, 11.8)  |
| Rural                                             | 2.3 (1.6, 3.0)    | 2.2 (1.8, 2.6)    | 4.3 (3.7, 4.9)    | 5.9 (5.2, 6.6)    | 6.5 (5.7, 7.4)    | 7.6 (6.7, 8.6)    |
| <b>Prevalence (&amp; 95%CI) of overweight (%)</b> |                   |                   |                   |                   |                   |                   |
| Overall                                           | 20.9 (18.6, 23.2) | 24.1 (22.1, 26.2) | 34.5 (32.8, 36.2) | 38.1 (36.6, 39.7) | 39.8 (38.0, 41.6) | 45.0 (43.3, 46.7) |
| Urban                                             | 25.0 (22.0, 28.1) | 28.1 (24.8, 31.4) | 39.4 (36.9, 42.0) | 40.7 (38.6, 42.7) | 42.0 (39.1, 44.8) | 48.1 (45.3, 51.0) |
| Rural                                             | 18.5 (15.4, 21.5) | 21.8 (19.3, 24.3) | 31.5 (29.4, 33.6) | 36.6 (34.5, 38.8) | 38.2 (35.8, 40.5) | 42.4 (40.3, 44.4) |
| <b>Women</b>                                      |                   |                   |                   |                   |                   |                   |
| <b>Mean (&amp; 95%CI) BMI (kg/m<sup>2</sup>)</b>  |                   |                   |                   |                   |                   |                   |
| Overall                                           | 22.9 (22.6, 23.1) | 23.0 (22.8, 23.2) | 23.6 (23.4, 23.8) | 23.9 (23.8, 24.1) | 23.9 (23.8, 24.1) | 24.1 (24.0, 24.2) |
| Urban                                             | 22.9 (22.6, 23.2) | 22.9 (22.7, 23.2) | 23.7 (23.4, 23.9) | 23.8 (23.6, 24.0) | 23.7 (23.5, 23.9) | 23.9 (23.6, 24.1) |
| Rural                                             | 22.9 (22.5, 23.2) | 23.1 (22.8, 23.4) | 23.6 (23.4, 23.8) | 24.0 (23.8, 24.2) | 24.1 (23.9, 24.2) | 24.3 (24.1, 24.5) |
| <b>Prevalence (&amp; 95%CI) of obesity (%)</b>    |                   |                   |                   |                   |                   |                   |
| Overall                                           | 3.7 (3.0, 4.4)    | 3.6 (3.1, 4.2)    | 5.2 (4.6, 5.7)    | 6.6 (6.1, 7.1)    | 6.5 (5.9, 7.0)    | 7.2 (6.7, 7.8)    |
| Urban                                             | 3.9 (2.7, 5.1)    | 3.7 (2.9, 4.5)    | 5.6 (4.9, 6.3)    | 6.2 (5.5, 6.9)    | 6.2 (5.5, 6.9)    | 6.9 (6.1, 7.8)    |
| Rural                                             | 3.6 (2.7, 4.5)    | 3.6 (2.8, 4.4)    | 4.9 (4.2, 5.6)    | 6.8 (6.1, 7.4)    | 6.6 (5.9, 7.4)    | 7.5 (6.7, 8.3)    |
| <b>Prevalence (&amp; 95%CI) of overweight (%)</b> |                   |                   |                   |                   |                   |                   |
| Overall                                           | 24.6 (22.2, 27.1) | 25.6 (23.5, 27.7) | 31.5 (29.8, 33.3) | 35.3 (33.7, 36.8) | 34.4 (32.9, 35.9) | 36.7 (35.2, 38.2) |
| Urban                                             | 25.1 (22.1, 28.2) | 25.8 (23.3, 28.4) | 31.7 (29.3, 34.2) | 33.8 (31.4, 36.2) | 31.8 (29.9, 33.6) | 34.4 (32.1, 36.8) |
| Rural                                             | 24.4 (20.9, 27.8) | 25.5 (22.5, 28.4) | 31.4 (29.1, 33.7) | 36.1 (34.2, 38.0) | 36.3 (34.3, 38.2) | 38.5 (36.6, 40.3) |

**Appendix Table 1.** Continued.

| <b>Both</b>                                       |                   |                   |                   |                   |                   |                   |
|---------------------------------------------------|-------------------|-------------------|-------------------|-------------------|-------------------|-------------------|
| <b>Mean (&amp; 95%CI) BMI (kg/m<sup>2</sup>)</b>  |                   |                   |                   |                   |                   |                   |
| Overall                                           | 22.7 (22.5, 22.9) | 23.0 (22.8, 23.2) | 23.7 (23.6, 23.9) | 24.0 (23.9, 24.2) | 24.1 (24.0, 24.2) | 24.4 (24.3, 24.6) |
| Urban                                             | 22.9 (22.6, 23.2) | 23.1 (22.9, 23.4) | 24.0 (23.7, 24.2) | 24.1 (23.9, 24.3) | 24.1 (23.9, 24.3) | 24.5 (24.3, 24.7) |
| Rural                                             | 22.6 (22.2, 22.9) | 22.9 (22.7, 23.2) | 23.6 (23.4, 23.8) | 24.0 (23.8, 24.2) | 24.1 (23.9, 24.3) | 24.4 (24.2, 24.5) |
| <b>Prevalence (&amp; 95%CI) of obesity (%)</b>    |                   |                   |                   |                   |                   |                   |
| Overall                                           | 3.1 (2.5, 3.7)    | 3.0 (2.6, 3.4)    | 5.1 (4.6, 5.6)    | 6.4 (6.0, 6.9)    | 6.6 (6.1, 7.2)    | 8.1 (7.6, 8.7)    |
| Urban                                             | 3.5 (2.5, 4.5)    | 3.2 (2.6, 3.9)    | 6.0 (5.2, 6.8)    | 6.6 (5.8, 7.3)    | 6.7 (6.0, 7.4)    | 8.8 (7.9, 9.7)    |
| Rural                                             | 2.9 (2.2, 3.6)    | 2.9 (2.4, 3.4)    | 4.6 (4.0, 5.2)    | 6.4 (5.8, 6.9)    | 6.6 (5.8, 7.4)    | 7.6 (6.9, 8.3)    |
| <b>Prevalence (&amp; 95%CI) of overweight (%)</b> |                   |                   |                   |                   |                   |                   |
| Overall                                           | 22.7 (20.5, 25.0) | 24.9 (23.0, 26.7) | 33.0 (31.5, 34.6) | 36.7 (35.3, 38.1) | 37.1 (35.6, 38.6) | 40.9 (39.5, 42.2) |
| Urban                                             | 25.1 (22.2, 27.9) | 27.0 (24.4, 29.5) | 35.7 (33.4, 38.0) | 37.3 (35.2, 39.4) | 37.0 (34.8, 39.1) | 41.4 (39.1, 43.6) |
| Rural                                             | 21.4 (18.2, 24.5) | 23.6 (21.1, 26.1) | 31.5 (29.5, 33.5) | 36.4 (34.4, 38.3) | 37.2 (35.2, 39.2) | 40.4 (38.8, 42.0) |

**Appendix Table 2. Annual change in standardised mean BMI, prevalence of obesity and prevalence of overweight from 2004 to 2010 and from 2010 to 2018 in different age groups, education levels, occupation groups and regions, by sex.**

| Change (& 95%CI) in<br>mean BMI (kg/m <sup>2</sup> ) | Men (overall)       |                   |                    | Women (overall) |                     |                     |        |
|------------------------------------------------------|---------------------|-------------------|--------------------|-----------------|---------------------|---------------------|--------|
|                                                      | 2004-2010           | 2010-2018         | p*                 | 2004-2010       | 2010-2018           | p*                  |        |
| Age group                                            | 18-29 years         | 0.21 (0.14, 0.28) | 0.13 (0.08, 0.18)  | 0.0442          | 0.12 (0.07, 0.17)   | 0.09 (0.05, 0.13)   | 0.2341 |
|                                                      | 30-39 years         | 0.22 (0.18, 0.27) | 0.13 (0.09, 0.16)  | 0.0037          | 0.12 (0.07, 0.17)   | 0.05 (0.02, 0.08)   | 0.0282 |
|                                                      | 40-49 years         | 0.24 (0.18, 0.29) | 0.10 (0.07, 0.13)  | 0.0001          | 0.12 (0.07, 0.18)   | 0.04 (0.01, 0.07)   | 0.0118 |
|                                                      | 50-59 years         | 0.18 (0.13, 0.24) | 0.12 (0.09, 0.14)  | 0.0367          | 0.12 (0.06, 0.18)   | 0.06 (0.03, 0.09)   | 0.0670 |
|                                                      | 60-69 years         | 0.21 (0.15, 0.27) | 0.08 (0.05, 0.11)  | 0.0005          | 0.16 (0.09, 0.24)   | 0.04 (0.01, 0.08)   | 0.0074 |
| Education                                            | No education        | 0.23 (0.17, 0.28) | 0.09 (0.05, 0.13)  | 0.0003          | 0.18 (0.12, 0.24)   | 0.09 (0.06, 0.12)   | 0.0172 |
|                                                      | Primary             | 0.23 (0.18, 0.28) | 0.12 (0.09, 0.15)  | 0.0020          | 0.16 (0.09, 0.23)   | 0.10 (0.06, 0.13)   | 0.0885 |
|                                                      | Secondary           | 0.21 (0.15, 0.28) | 0.11 (0.07, 0.14)  | 0.0055          | 0.11 (0.06, 0.17)   | 0.09 (0.06, 0.13)   | 0.3065 |
|                                                      | College             | 0.18 (0.12, 0.23) | 0.11 (0.07, 0.15)  | 0.0429          | 0.11 (0.05, 0.16)   | 0.03 (0.00, 0.07)   | 0.0457 |
| Region                                               | East                | 0.22 (0.14, 0.30) | 0.14 (0.09, 0.19)  | 0.0787          | 0.13 (0.04, 0.22)   | 0.08 (0.03, 0.13)   | 0.2043 |
|                                                      | South               | 0.20 (0.04, 0.37) | 0.11 (0.03, 0.18)  | 0.1720          | 0.10 (-0.01, 0.22)  | 0.05 (-0.01, 0.10)  | 0.2060 |
|                                                      | North               | 0.22 (0.13, 0.31) | 0.10 (0.03, 0.17)  | 0.0249          | 0.13 (0.03, 0.22)   | 0.03 (-0.03, 0.08)  | 0.0559 |
|                                                      | Central             | 0.20 (0.08, 0.33) | 0.12 (0.05, 0.18)  | 0.1546          | 0.11 (-0.01, 0.22)  | 0.06 (0.00, 0.12)   | 0.2645 |
|                                                      | Northeast           | 0.20 (0.15, 0.26) | 0.15 (0.10, 0.20)  | 0.1210          | 0.14 (0.06, 0.21)   | 0.10 (0.05, 0.14)   | 0.2180 |
|                                                      | Southwest           | 0.27 (0.21, 0.32) | 0.10 (0.06, 0.15)  | 0.0001          | 0.19 (0.11, 0.27)   | 0.09 (0.04, 0.14)   | 0.0448 |
|                                                      | Northwest           | 0.24 (0.12, 0.35) | 0.07 (0.01, 0.13)  | 0.0109          | 0.13 (0.00, 0.27)   | 0.00 (-0.06, 0.06)  | 0.0574 |
| Occupation                                           | Agriculture related | 0.24 (0.18, 0.30) | 0.11 (0.08, 0.14)  | 0.0007          | 0.19 (0.12, 0.25)   | 0.11 (0.08, 0.14)   | 0.0314 |
|                                                      | Other manual work   | 0.23 (0.16, 0.31) | 0.11 (0.05, 0.16)  | 0.0092          | 0.10 (-0.02, 0.22)  | 0.16 (0.09, 0.23)   | 0.2422 |
|                                                      | Non-manual work     | 0.16 (0.11, 0.22) | 0.12 (0.08, 0.15)  | 0.1102          | 0.18 (0.13, 0.23)   | 0.05 (0.02, 0.08)   | 0.0002 |
|                                                      | Not working         | 0.12 (0.02, 0.23) | 0.05 (-0.03, 0.14) | 0.1868          | -0.06 (-0.17, 0.04) | 0.09 (0.03, 0.16)   | 0.0194 |
|                                                      | Retired             | 0.18 (0.11, 0.26) | 0.03 (-0.03, 0.09) | 0.0015          | 0.09 (0.02, 0.16)   | -0.02 (-0.08, 0.03) | 0.0246 |

\* p-value for difference in annual changes for 2004-2010 versus 2010-2018.

**Appendix Table 2.** Continued.

| % change (& 95%CI)<br>in obesity prevalence |                     | Men (overall)     |                  |        | Women (overall)   |                  |        |
|---------------------------------------------|---------------------|-------------------|------------------|--------|-------------------|------------------|--------|
|                                             |                     | 2004-2010         | 2010-2018        | p*     | 2004-2010         | 2010-2018        | p*     |
| Age group                                   | 18-29 years         | 9.2 (2.6, 17.0)   | 10.8 (7.2, 14.4) | 0.3490 | 9.9 (1.7, 20.2)   | 10.9 (6.7, 15.2) | 0.4123 |
|                                             | 30-39 years         | 17.5 (11.6, 24.3) | 8.1 (5.7, 10.6)  | 0.0042 | 11.1 (6.1, 16.7)  | 5.6 (3.2, 8.1)   | 0.0461 |
|                                             | 40-49 years         | 13.3 (8.1, 19.2)  | 4.7 (2.6, 6.8)   | 0.0035 | 4.1 (-0.3, 9.1)   | 2.6 (0.5, 4.7)   | 0.3055 |
|                                             | 50-59 years         | 10.1 (3.2, 18.4)  | 7.1 (4.7, 9.6)   | 0.2541 | 2.5 (-1.1, 6.4)   | 2.6 (0.9, 4.4)   | 0.4727 |
|                                             | 60-69 years         | 8.7 (2.4, 16.0)   | 3.1 (0.4, 5.9)   | 0.0881 | 5.6 (0.9, 10.9)   | 0.1 (-1.8, 2.2)  | 0.0365 |
| Education                                   | No education        | 10.8 (1.3, 23.4)  | 9.2 (5.5, 13.3)  | 0.4208 | 9.3 (4.6, 14.4)   | 3.6 (1.7, 5.7)   | 0.0294 |
|                                             | Primary             | 16.0 (9.7, 23.2)  | 7.3 (4.2, 10.5)  | 0.0190 | 6.3 (1.7, 11.5)   | 4.0 (1.4, 6.5)   | 0.2324 |
|                                             | Secondary           | 9.8 (4.1, 16.4)   | 6.2 (4.0, 8.5)   | 0.1680 | 4.4 (-0.5, 10.1)  | 5.9 (3.6, 8.3)   | 0.3140 |
|                                             | College             | 12.5 (7.2, 18.5)  | 7.6 (5.2, 10.1)  | 0.0781 | 7.7 (2.2, 13.8)   | 5.4 (2.3, 8.5)   | 0.2704 |
| Region                                      | East                | 13.6 (4.7, 24.8)  | 8.5 (5.1, 12.0)  | 0.1900 | 9.2 (2.1, 17.8)   | 4.9 (2.0, 7.9)   | 0.1809 |
|                                             | South               | 6.3 (-7.5, 27.1)  | 15.0 (8.0, 22.9) | 0.1823 | 1.6 (-7.7, 13.6)  | 3.1 (-1.7, 8.3)  | 0.3931 |
|                                             | North               | 8.9 (2.5, 16.8)   | 6.9 (4.2, 9.5)   | 0.3299 | 3.6 (-2.8, 11.1)  | 3.6 (0.6, 6.7)   | 0.4905 |
|                                             | Central             | 14.8 (-0.2, 38.2) | 7.7 (2.5, 13.5)  | 0.2604 | 10.0 (2.2, 18.5)  | 2.4 (-1.8, 7.0)  | 0.0881 |
|                                             | Northeast           | 18.2 (12.5, 24.3) | 6.3 (3.3, 9.5)   | 0.0015 | 3.9 (-0.3, 8.4)   | 7.3 (4.3, 10.2)  | 0.1367 |
|                                             | Southwest           | 20.1 (9.3, 35.4)  | 7.4 (3.6, 11.1)  | 0.0190 | 19.8 (13.9, 26.4) | 8.1 (4.7, 11.5)  | 0.0020 |
|                                             | Northwest           | 12.0 (-0.5, 30.7) | 3.5 (-1.9, 9.0)  | 0.1606 | 4.7 (-6.3, 20.0)  | 0.6 (-4.1, 5.6)  | 0.3066 |
| Occupation                                  | Agriculture related | 18.1 (11.3, 26.0) | 6.7 (4.2, 9.4)   | 0.0030 | 9.7 (4.7, 15.3)   | 5.1 (3.0, 7.2)   | 0.0736 |
|                                             | Other manual work   | 14.9 (7.6, 23.7)  | 4.6 (1.0, 8.2)   | 0.0124 | 9.8 (0.4, 21.5)   | 8.3 (2.5, 14.0)  | 0.4282 |
|                                             | Non-manual work     | 7.4 (2.5, 13.0)   | 8.2 (5.9, 10.5)  | 0.3971 | 10.2 (5.5, 15.4)  | 4.6 (2.4, 6.9)   | 0.0343 |
|                                             | Not working         | 6.8 (-3.8, 22.1)  | 3.3 (-2.1, 8.7)  | 0.3354 | -1.5 (-10.0, 8.0) | 5.2 (-0.7, 11.5) | 0.1562 |
|                                             | Retired             | 7.0 (-0.3, 16.2)  | 2.6 (-3.6, 8.1)  | 0.2123 | 3.2 (-0.9, 7.5)   | 0.0 (-2.5, 2.5)  | 0.1279 |

\* p-value for difference in annual changes for 2004-2010 versus 2010-2018.



**Appendix Table 2.** Continued.

| % change (& 95%CI) in<br>overweight prevalence |                     | Men (overall)     |                 |         | Women (overall)  |                  |        |
|------------------------------------------------|---------------------|-------------------|-----------------|---------|------------------|------------------|--------|
|                                                |                     | 2004-2010         | 2010-2018       | p*      | 2004-2010        | 2010-2018        | p*     |
| Age group                                      | 18-29 years         | 10.4 (7.0, 14.3)  | 4.4 (2.9, 5.9)  | 0.0018  | 5.9 (2.2, 10.0)  | 4.5 (2.6, 6.3)   | 0.2804 |
|                                                | 30-39 years         | 8.6 (6.3, 10.9)   | 3.5 (2.5, 4.5)  | 0.0002  | 5.0 (2.9, 7.3)   | 2.0 (0.9, 3.2)   | 0.0193 |
|                                                | 40-49 years         | 8.8 (6.6, 11.2)   | 2.8 (1.9, 3.7)  | <0.0001 | 3.7 (1.9, 5.6)   | 1.1 (0.3, 2.0)   | 0.0131 |
|                                                | 50-59 years         | 7.4 (4.8, 10.3)   | 3.3 (2.4, 4.2)  | 0.0035  | 3.2 (1.4, 5.0)   | 1.4 (0.5, 2.3)   | 0.0699 |
|                                                | 60-69 years         | 8.1 (5.1, 11.4)   | 2.6 (1.6, 3.7)  | 0.0008  | 4.3 (1.8, 6.9)   | 0.9 (0.0, 1.9)   | 0.0152 |
| Education                                      | No education        | 13.6 (9.7, 18.1)  | 4.4 (2.9, 5.9)  | <0.0001 | 6.2 (3.7, 8.9)   | 2.5 (1.6, 3.5)   | 0.0092 |
|                                                | Primary             | 11.4 (8.7, 14.4)  | 4.1 (3.0, 5.3)  | <0.0001 | 5.4 (2.9, 8.1)   | 2.7 (1.6, 3.7)   | 0.0382 |
|                                                | Secondary           | 7.7 (5.2, 10.3)   | 3.2 (2.4, 4.2)  | 0.0009  | 3.9 (1.6, 6.3)   | 2.8 (1.8, 3.9)   | 0.2375 |
|                                                | College             | 6.7 (4.7, 8.8)    | 2.6 (1.7, 3.6)  | 0.0009  | 3.1 (0.4, 5.9)   | 1.3 (-0.3, 2.9)  | 0.1684 |
| Region                                         | East                | 8.4 (4.7, 12.5)   | 3.6 (2.4, 5.0)  | 0.0154  | 4.8 (0.9, 9.2)   | 2.6 (1.0, 4.3)   | 0.1915 |
|                                                | South               | 9.8 (1.5, 20.2)   | 4.4 (1.4, 7.8)  | 0.1626  | 2.1 (-2.6, 7.5)  | 3.3 (1.0, 5.5)   | 0.3436 |
|                                                | North               | 7.0 (3.3, 11.3)   | 2.6 (0.9, 4.2)  | 0.0215  | 3.7 (0.9, 6.7)   | 0.1 (-1.5, 1.6)  | 0.0261 |
|                                                | Central             | 8.6 (2.9, 15.3)   | 4.0 (2.0, 6.1)  | 0.0949  | 4.4 (0.0, 9.4)   | 1.8 (-0.2, 3.9)  | 0.1870 |
|                                                | Northeast           | 7.5 (4.8, 10.4)   | 3.9 (2.6, 5.3)  | 0.0250  | 4.0 (1.4, 6.8)   | 2.4 (1.2, 3.7)   | 0.1799 |
|                                                | Southwest           | 17.4 (13.1, 22.2) | 3.6 (1.8, 5.4)  | <0.0001 | 10.1 (5.5, 15.1) | 3.2 (1.3, 5.3)   | 0.0107 |
|                                                | Northwest           | 10.3 (4.4, 17.4)  | 2.4 (0.5, 4.3)  | 0.0091  | 4.3 (-0.7, 10.2) | 0.7 (-1.2, 2.6)  | 0.1270 |
| Occupation                                     | Agriculture related | 11.8 (8.6, 15.2)  | 4.1 (3.0, 5.2)  | <0.0001 | 6.8 (4.2, 9.6)   | 3.0 (2.0, 4.0)   | 0.0082 |
|                                                | Other manual work   | 8.2 (5.3, 11.3)   | 2.7 (1.2, 4.2)  | 0.0016  | 5.3 (-0.5, 12.0) | 4.9 (2.1, 8.0)   | 0.4643 |
|                                                | Non-manual work     | 5.7 (3.8, 7.6)    | 2.8 (2.0, 3.7)  | 0.0075  | 6.3 (4.0, 8.7)   | 1.6 (0.5, 2.7)   | 0.0008 |
|                                                | Not working         | 5.0 (1.3, 9.0)    | 2.7 (0.4, 4.9)  | 0.1836  | -3.2 (-6.3, 0.0) | 4.1 (1.9, 6.4)   | 0.0012 |
|                                                | Retired             | 5.4 (3.0, 8.1)    | 0.7 (-0.6, 1.9) | 0.0006  | 2.2 (0.2, 4.1)   | -0.6 (-1.9, 0.7) | 0.0277 |

\* p-value for difference in annual changes for 2004-2010 versus 2010-2018.

**Appendix Table 3. Annual change in standardised mean BMI, prevalence of obesity and prevalence of overweight from 2004 to 2010 and from 2010 to 2018 in different age groups, education levels, occupation groups and regions, by sex and urban or rural residence.**

| Change (& 95%CI) in<br>mean BMI (kg/m <sup>2</sup> ) | Urban men           |                    |                     | Rural men |                    |                    |        |
|------------------------------------------------------|---------------------|--------------------|---------------------|-----------|--------------------|--------------------|--------|
|                                                      | 2004-2010           | 2010-2018          | p*                  | 2004-2010 | 2010-2018          | p*                 |        |
| Age group                                            | 18-29 years         | 0.21 (0.11, 0.31)  | 0.12 (0.04, 0.20)   | 0.1285    | 0.21 (0.12, 0.31)  | 0.12 (0.06, 0.18)  | 0.0666 |
|                                                      | 30-39 years         | 0.23 (0.17, 0.28)  | 0.13 (0.07, 0.18)   | 0.0246    | 0.22 (0.16, 0.29)  | 0.10 (0.06, 0.15)  | 0.0054 |
|                                                      | 40-49 years         | 0.24 (0.17, 0.31)  | 0.08 (0.04, 0.12)   | 0.0003    | 0.24 (0.16, 0.31)  | 0.10 (0.06, 0.14)  | 0.0034 |
|                                                      | 50-59 years         | 0.19 (0.10, 0.27)  | 0.08 (0.04, 0.12)   | 0.0272    | 0.18 (0.11, 0.25)  | 0.13 (0.10, 0.17)  | 0.1446 |
|                                                      | 60-69 years         | 0.21 (0.11, 0.31)  | 0.03 (-0.02, 0.08)  | 0.0045    | 0.21 (0.14, 0.28)  | 0.09 (0.05, 0.12)  | 0.0048 |
| Education                                            | No education        | 0.26 (0.17, 0.34)  | 0.08 (0.00, 0.17)   | 0.0089    | 0.22 (0.16, 0.28)  | 0.09 (0.05, 0.14)  | 0.0022 |
|                                                      | Primary             | 0.25 (0.17, 0.32)  | 0.09 (0.02, 0.15)   | 0.0037    | 0.22 (0.16, 0.29)  | 0.13 (0.09, 0.17)  | 0.0159 |
|                                                      | Secondary           | 0.21 (0.13, 0.28)  | 0.09 (0.04, 0.14)   | 0.0178    | 0.22 (0.13, 0.30)  | 0.11 (0.07, 0.15)  | 0.0246 |
|                                                      | College             | 0.19 (0.12, 0.26)  | 0.11 (0.05, 0.16)   | 0.0483    | 0.16 (0.08, 0.25)  | 0.10 (0.04, 0.16)  | 0.1570 |
| Region                                               | East                | 0.27 (0.18, 0.36)  | 0.11 (0.05, 0.18)   | 0.0154    | 0.19 (0.05, 0.32)  | 0.15 (0.09, 0.21)  | 0.3279 |
|                                                      | South               | 0.18 (0.07, 0.29)  | -0.01 (-0.08, 0.06) | 0.0044    | 0.28 (0.15, 0.41)  | 0.17 (0.08, 0.26)  | 0.1248 |
|                                                      | North               | 0.13 (0.06, 0.20)  | 0.16 (0.09, 0.23)   | 0.3247    | 0.26 (0.16, 0.37)  | 0.03 (-0.05, 0.10) | 0.0007 |
|                                                      | Central             | 0.09 (-0.01, 0.19) | 0.22 (0.12, 0.32)   | 0.0513    | 0.24 (0.09, 0.40)  | 0.09 (0.01, 0.16)  | 0.0687 |
|                                                      | Northeast           | 0.20 (0.12, 0.28)  | 0.16 (0.09, 0.23)   | 0.2785    | 0.20 (0.13, 0.27)  | 0.13 (0.07, 0.20)  | 0.1203 |
|                                                      | Southwest           | 0.26 (0.17, 0.36)  | 0.09 (0.01, 0.17)   | 0.0137    | 0.27 (0.20, 0.34)  | 0.11 (0.05, 0.16)  | 0.0019 |
|                                                      | Northwest           | 0.20 (0.00, 0.39)  | 0.02 (-0.08, 0.13)  | 0.0856    | 0.26 (0.13, 0.38)  | 0.08 (0.01, 0.15)  | 0.0142 |
| Occupation                                           | Agriculture related | 0.26 (0.18, 0.35)  | 0.08 (0.02, 0.14)   | 0.0031    | 0.23 (0.16, 0.30)  | 0.11 (0.08, 0.15)  | 0.0054 |
|                                                      | Other manual work   | 0.26 (0.15, 0.36)  | 0.08 (-0.01, 0.17)  | 0.0146    | 0.23 (0.13, 0.33)  | 0.12 (0.06, 0.19)  | 0.0664 |
|                                                      | Non-manual work     | 0.19 (0.13, 0.25)  | 0.11 (0.06, 0.16)   | 0.0458    | 0.14 (0.05, 0.23)  | 0.12 (0.07, 0.17)  | 0.3766 |
|                                                      | Not working         | 0.14 (0.00, 0.28)  | 0.08 (-0.04, 0.19)  | 0.2712    | 0.12 (-0.05, 0.29) | 0.03 (-0.08, 0.13) | 0.2116 |
|                                                      | Retired             | 0.17 (0.09, 0.25)  | 0.03 (-0.04, 0.10)  | 0.0071    | 0.20 (0.05, 0.35)  | 0.00 (-0.08, 0.09) | 0.0252 |

\* p-value for difference in annual changes for 2004-2010 versus 2010-2018.

**Appendix Table 2.** Continued.

|            | Change (& 95%CI) in<br>mean BMI (kg/m <sup>2</sup> ) | Urban women         |                     |         | Rural women          |                     |        |
|------------|------------------------------------------------------|---------------------|---------------------|---------|----------------------|---------------------|--------|
|            |                                                      | 2004-2010           | 2010-2018           | p*      | 2004-2010            | 2010-2018           | p*     |
| Age group  | 18-29 years                                          | 0.16 (0.09, 0.23)   | 0.06 (0.00, 0.12)   | 0.0428  | 0.09 (0.03, 0.16)    | 0.12 (0.07, 0.17)   | 0.2752 |
|            | 30-39 years                                          | 0.15 (0.10, 0.20)   | 0.02 (-0.02, 0.07)  | 0.0013  | 0.10 (0.03, 0.17)    | 0.08 (0.03, 0.12)   | 0.3059 |
|            | 40-49 years                                          | 0.11 (0.04, 0.19)   | 0.00 (-0.04, 0.05)  | 0.0203  | 0.12 (0.05, 0.20)    | 0.07 (0.03, 0.10)   | 0.1026 |
|            | 50-59 years                                          | 0.09 (0.01, 0.17)   | 0.02 (-0.03, 0.06)  | 0.1160  | 0.14 (0.06, 0.22)    | 0.08 (0.04, 0.12)   | 0.1565 |
|            | 60-69 years                                          | 0.12 (0.03, 0.21)   | -0.03 (-0.08, 0.01) | 0.0047  | 0.18 (0.09, 0.27)    | 0.07 (0.02, 0.12)   | 0.0400 |
| Education  | No education                                         | 0.14 (0.05, 0.22)   | 0.06 (0.01, 0.12)   | 0.1358  | 0.20 (0.12, 0.28)    | 0.10 (0.06, 0.14)   | 0.0206 |
|            | Primary                                              | 0.21 (0.09, 0.33)   | 0.04 (-0.02, 0.09)  | 0.0106  | 0.15 (0.06, 0.24)    | 0.11 (0.06, 0.16)   | 0.2657 |
|            | Secondary                                            | 0.15 (0.06, 0.23)   | 0.07 (0.02, 0.11)   | 0.0828  | 0.10 (0.02, 0.17)    | 0.11 (0.06, 0.15)   | 0.4308 |
|            | College                                              | 0.16 (0.09, 0.23)   | 0.02 (-0.03, 0.07)  | 0.0039  | 0.01 (-0.09, 0.11)   | 0.06 (0.01, 0.12)   | 0.2155 |
| Region     | East                                                 | 0.16 (0.07, 0.25)   | 0.03 (-0.03, 0.09)  | 0.0274  | 0.11 (-0.04, 0.25)   | 0.13 (0.06, 0.20)   | 0.3946 |
|            | South                                                | 0.10 (0.02, 0.17)   | -0.02 (-0.10, 0.05) | 0.0463  | 0.14 (-0.04, 0.33)   | 0.09 (0.04, 0.15)   | 0.3142 |
|            | North                                                | 0.09 (-0.09, 0.28)  | 0.04 (-0.04, 0.12)  | 0.3251  | 0.15 (0.04, 0.26)    | 0.01 (-0.06, 0.08)  | 0.0393 |
|            | Central                                              | 0.06 (-0.03, 0.16)  | 0.03 (-0.06, 0.12)  | 0.3580  | 0.13 (-0.03, 0.28)   | 0.07 (-0.01, 0.15)  | 0.2870 |
|            | Northeast                                            | 0.21 (0.08, 0.35)   | 0.06 (0.00, 0.11)   | 0.0224  | 0.11 (0.02, 0.19)    | 0.15 (0.09, 0.21)   | 0.2733 |
|            | Southwest                                            | 0.18 (0.11, 0.26)   | 0.05 (-0.01, 0.12)  | 0.0234  | 0.20 (0.09, 0.30)    | 0.11 (0.04, 0.18)   | 0.1561 |
|            | Northwest                                            | -0.05 (-0.24, 0.14) | -0.03 (-0.12, 0.06) | 0.4428  | 0.22 (0.08, 0.36)    | 0.04 (-0.03, 0.11)  | 0.0225 |
| Occupation | Agriculture related                                  | 0.20 (0.10, 0.30)   | 0.09 (0.03, 0.15)   | 0.0432  | 0.18 (0.11, 0.26)    | 0.11 (0.07, 0.15)   | 0.0669 |
|            | Other manual work                                    | 0.09 (0.00, 0.18)   | 0.10 (0.02, 0.18)   | 0.4447  | 0.10 (-0.08, 0.28)   | 0.20 (0.10, 0.30)   | 0.1941 |
|            | Non-manual work                                      | 0.23 (0.16, 0.29)   | 0.03 (-0.02, 0.07)  | <0.0001 | 0.10 (0.03, 0.17)    | 0.07 (0.03, 0.12)   | 0.2593 |
|            | Not working                                          | 0.03 (-0.11, 0.18)  | 0.03 (-0.06, 0.11)  | 0.4735  | -0.21 (-0.36, -0.07) | 0.20 (0.11, 0.29)   | 0.0001 |
|            | Retired                                              | 0.10 (0.01, 0.18)   | -0.02 (-0.08, 0.04) | 0.0333  | 0.06 (-0.05, 0.18)   | -0.01 (-0.11, 0.08) | 0.2038 |

\* p-value for difference in annual changes for 2004-2010 versus 2010-2018.

**Appendix Table 2.** Continued.

| % change (& 95%CI)<br>in obesity prevalence |                     | Urban men         |                  |        | Rural men         |                   |         |
|---------------------------------------------|---------------------|-------------------|------------------|--------|-------------------|-------------------|---------|
|                                             |                     | 2004-2010         | 2010-2018        | p*     | 2004-2010         | 2010-2018         | p*      |
| Age group                                   | 18-29 years         | 8.4 (0.2, 17.9)   | 8.7 (4.2, 13.5)  | 0.4687 | 10.6 (0.4, 24.7)  | 12.4 (6.8, 17.9)  | 0.3760  |
|                                             | 30-39 years         | 24.2 (14.4, 37.1) | 8.0 (4.9, 11.1)  | 0.0012 | 12.9 (5.9, 21.4)  | 6.3 (3.2, 9.5)    | 0.0727  |
|                                             | 40-49 years         | 17.1 (10.3, 25.2) | 3.6 (0.7, 6.5)   | 0.0006 | 11.1 (4.1, 19.3)  | 5.1 (2.2, 8.2)    | 0.0969  |
|                                             | 50-59 years         | 8.2 (-1.2, 21.6)  | 7.2 (4.0, 10.5)  | 0.4627 | 12.2 (2.8, 24.5)  | 6.8 (3.6, 10.2)   | 0.1881  |
|                                             | 60-69 years         | 6.5 (-1.9, 16.4)  | 0.4 (-3.4, 4.7)  | 0.1485 | 11.4 (2.5, 22.6)  | 4.6 (1.0, 8.5)    | 0.1224  |
| Education                                   | No education        | 18.5 (0.7, 51.2)  | 7.8 (1.4, 15.4)  | 0.1996 | 9.2 (-2.0, 24.9)  | 9.7 (5.1, 14.7)   | 0.4484  |
|                                             | Primary             | 9.1 (-1.1, 21.4)  | 8.9 (2.6, 15.5)  | 0.4879 | 19.8 (11.8, 29.3) | 6.5 (2.9, 10.3)   | 0.0044  |
|                                             | Secondary           | 13.1 (4.7, 23.9)  | 4.4 (1.5, 7.5)   | 0.0434 | 8.0 (0.6, 17.1)   | 7.2 (4.1, 10.5)   | 0.4455  |
|                                             | College             | 14.2 (6.9, 23.1)  | 7.4 (4.5, 10.3)  | 0.0662 | 10.5 (3.1, 19.3)  | 7.6 (2.9, 12.2)   | 0.2913  |
| Region                                      | East                | 23.9 (12.3, 38.7) | 6.3 (1.9, 11.2)  | 0.0089 | 6.8 (-3.7, 21.9)  | 10.5 (5.8, 15.2)  | 0.2795  |
|                                             | South               | 2.9 (-11.4, 23.6) | 10.2 (2.5, 19.2) | 0.2349 | 21.8 (4.1, 44.2)  | 18.3 (5.0, 31.7)  | 0.3997  |
|                                             | North               | 4.8 (-1.6, 12.8)  | 7.8 (5.0, 10.5)  | 0.2306 | 11.7 (3.0, 23.3)  | 5.1 (1.7, 8.6)    | 0.1196  |
|                                             | Central             | 15.7 (8.6, 23.8)  | 13.4 (9.0, 17.8) | 0.3334 | 14.8 (-5.1, 44.8) | 4.8 (-1.6, 12.9)  | 0.2479  |
|                                             | Northeast           | 22.4 (14.1, 31.7) | 6.0 (2.0, 10.2)  | 0.0021 | 15.5 (8.7, 23.2)  | 5.9 (2.0, 9.9)    | 0.0226  |
|                                             | Southwest           | 14.3 (-3.7, 44.2) | 8.2 (1.4, 15.8)  | 0.3502 | 26.3 (18.0, 36.7) | 6.2 (2.1, 10.2)   | <0.0001 |
|                                             | Northwest           | 6.5 (-12.9, 34.6) | 0.4 (-9.9, 11.8) | 0.3550 | 18.3 (7.0, 32.9)  | 5.7 (0.2, 11.4)   | 0.0470  |
| Occupation                                  | Agriculture related | 27.2 (12.9, 48.7) | 4.8 (0.4, 9.5)   | 0.0031 | 16.4 (9.0, 25.3)  | 7.2 (4.2, 10.4)   | 0.0256  |
|                                             | Other manual work   | 19.0 (9.9, 30.6)  | 2.9 (-1.8, 7.5)  | 0.0025 | 12.0 (1.4, 27.2)  | 6.2 (1.0, 11.3)   | 0.2214  |
|                                             | Non-manual work     | 12.6 (6.1, 20.0)  | 7.7 (5.0, 10.6)  | 0.1235 | 2.0 (-5.0, 10.5)  | 8.5 (4.6, 12.5)   | 0.0979  |
|                                             | Not working         | 5.5 (-7.4, 25.5)  | 4.7 (-2.1, 11.6) | 0.4999 | 13.9 (-0.1, 34.4) | 0.7 (-7.9, 9.0)   | 0.0936  |
|                                             | Retired             | 6.7 (-1.5, 17.5)  | 2.9 (-4.0, 8.9)  | 0.2825 | 9.2 (-6.7, 38.1)  | -1.3 (-11.4, 7.7) | 0.1835  |

\* p-value for difference in annual changes for 2004-2010 versus 2010-2018.

**Appendix Table 2.** Continued.

| % change (& 95%CI)<br>in obesity prevalence |                     | Urban women        |                  |        | Rural women        |                  |        |
|---------------------------------------------|---------------------|--------------------|------------------|--------|--------------------|------------------|--------|
|                                             |                     | 2004-2010          | 2010-2018        | p*     | 2004-2010          | 2010-2018        | p*     |
| Age group                                   | 18-29 years         | 15.5 (2.9, 34.0)   | 6.7 (1.0, 12.4)  | 0.1551 | 6.7 (-3.8, 20.9)   | 14.6 (8.6, 20.6) | 0.1453 |
|                                             | 30-39 years         | 11.2 (4.1, 19.7)   | 4.9 (1.5, 8.4)   | 0.0896 | 11.3 (4.6, 19.1)   | 6.2 (2.9, 9.6)   | 0.1308 |
|                                             | 40-49 years         | 5.1 (-1.9, 13.7)   | 1.2 (-2.1, 4.6)  | 0.2066 | 3.8 (-1.9, 10.1)   | 3.5 (0.8, 6.3)   | 0.4762 |
|                                             | 50-59 years         | 2.6 (-2.7, 8.7)    | 2.2 (-0.4, 4.9)  | 0.4721 | 2.5 (-2.2, 7.9)    | 2.8 (0.6, 5.2)   | 0.4552 |
|                                             | 60-69 years         | 2.6 (-3.0, 9.1)    | -2.6 (-5.1, 0.1) | 0.0837 | 8.5 (1.8, 16.3)    | 1.8 (-1.0, 4.8)  | 0.0603 |
| Education                                   | No education        | 7.1 (0.0, 15.5)    | 2.8 (-0.5, 6.3)  | 0.1860 | 10.8 (4.9, 17.6)   | 3.7 (1.4, 6.2)   | 0.0295 |
|                                             | Primary             | 6.9 (-1.6, 17.7)   | 1.1 (-2.3, 4.8)  | 0.1534 | 6.4 (1.0, 12.6)    | 4.9 (1.7, 8.2)   | 0.3507 |
|                                             | Secondary           | 6.4 (0.0, 14.2)    | 2.8 (-0.3, 5.8)  | 0.1969 | 3.4 (-3.6, 12.2)   | 8.2 (4.9, 11.5)  | 0.1518 |
|                                             | College             | 11.1 (4.4, 18.8)   | 4.4 (0.7, 8.1)   | 0.0706 | 2.2 (-6.7, 12.9)   | 7.3 (2.3, 12.7)  | 0.2093 |
| Region                                      | East                | 13.6 (7.8, 19.7)   | 1.3 (-2.1, 4.9)  | 0.0026 | 6.3 (-4.5, 21.4)   | 8.1 (3.7, 12.7)  | 0.3744 |
|                                             | South               | 2.8 (-5.6, 12.7)   | 0.2 (-6.5, 6.6)  | 0.3432 | 6.2 (-12.1, 29.7)  | 5.0 (-0.2, 11.1) | 0.4870 |
|                                             | North               | 2.2 (-7.3, 15.2)   | 4.7 (0.6, 9.0)   | 0.3333 | 4.8 (-3.7, 15.1)   | 2.2 (-1.9, 6.6)  | 0.3383 |
|                                             | Central             | 11.2 (3.0, 20.0)   | -0.3 (-6.1, 5.3) | 0.0336 | 9.7 (-0.4, 21.0)   | 3.2 (-1.9, 9.2)  | 0.1873 |
|                                             | Northeast           | 5.0 (-2.8, 15.3)   | 5.5 (1.9, 8.9)   | 0.4447 | 3.5 (-1.5, 8.9)    | 9.1 (4.6, 13.5)  | 0.0877 |
|                                             | Southwest           | 19.4 (13.5, 25.5)  | 6.3 (1.4, 11.2)  | 0.0031 | 20.1 (12.0, 29.5)  | 9.1 (4.9, 13.5)  | 0.0244 |
|                                             | Northwest           | -5.8 (-19.7, 20.0) | -0.1 (-7.0, 7.4) | 0.2588 | 13.1 (2.3, 26.4)   | 1.9 (-4.0, 8.3)  | 0.0790 |
| Occupation                                  | Agriculture related | 9.5 (-0.3, 23.1)   | 5.3 (1.7, 9.0)   | 0.2710 | 10.0 (4.5, 16.4)   | 5.0 (2.7, 7.5)   | 0.0863 |
|                                             | Other manual work   | 13.5 (3.7, 26.6)   | 1.7 (-5.0, 7.7)  | 0.0372 | 6.1 (-8.2, 27.0)   | 14.4 (5.6, 23.7) | 0.2103 |
|                                             | Non-manual work     | 12.7 (6.4, 19.9)   | 3.2 (0.3, 6.2)   | 0.0103 | 7.7 (0.9, 15.9)    | 6.3 (3.0, 9.8)   | 0.3950 |
|                                             | Not working         | 4.6 (-7.1, 19.7)   | 1.4 (-5.5, 9.0)  | 0.3613 | -12.1 (-24.5, 1.4) | 14.4 (4.2, 26.8) | 0.0050 |
|                                             | Retired             | 3.6 (-1.1, 8.9)    | 0.1 (-2.5, 2.8)  | 0.1419 | 1.8 (-6.7, 10.9)   | -1.8 (-9.7, 5.7) | 0.2947 |

\* p-value for difference in annual changes for 2004-2010 versus 2010-2018.

**Appendix Table 2.** Continued.

| % change (& 95%CI) in<br>overweight prevalence |                     | Urban men        |                 |        | Rural men         |                 |         |
|------------------------------------------------|---------------------|------------------|-----------------|--------|-------------------|-----------------|---------|
|                                                |                     | 2004-2010        | 2010-2018       | p*     | 2004-2010         | 2010-2018       | p*      |
| Age group                                      | 18-29 years         | 10.7 (5.7, 16.5) | 3.5 (1.4, 5.7)  | 0.0082 | 10.3 (5.7, 15.7)  | 4.8 (2.7, 7.0)  | 0.0259  |
|                                                | 30-39 years         | 6.8 (4.3, 9.4)   | 3.1 (1.8, 4.5)  | 0.0161 | 10.1 (6.8, 13.8)  | 3.4 (2.1, 4.7)  | 0.0003  |
|                                                | 40-49 years         | 7.6 (5.2, 10.0)  | 1.8 (0.7, 2.9)  | 0.0001 | 9.8 (6.5, 13.4)   | 3.4 (2.2, 4.6)  | 0.0005  |
|                                                | 50-59 years         | 7.5 (4.2, 11.0)  | 2.2 (1.1, 3.3)  | 0.0028 | 7.5 (3.7, 11.8)   | 3.9 (2.7, 5.1)  | 0.0540  |
|                                                | 60-69 years         | 7.1 (3.4, 11.2)  | 1.3 (-0.3, 2.9) | 0.0084 | 8.8 (4.7, 13.6)   | 3.1 (1.8, 4.4)  | 0.0079  |
| Education                                      | No education        | 12.3 (7.6, 17.5) | 3.4 (0.8, 6.0)  | 0.0027 | 14.7 (9.6, 20.7)  | 4.7 (2.9, 6.5)  | 0.0003  |
|                                                | Primary             | 11.2 (7.3, 15.4) | 2.3 (0.3, 4.3)  | 0.0002 | 11.7 (8.2, 15.6)  | 4.7 (3.4, 6.1)  | 0.0004  |
|                                                | Secondary           | 5.9 (3.1, 9.0)   | 2.7 (1.5, 3.9)  | 0.0357 | 8.9 (5.6, 12.7)   | 3.4 (2.2, 4.6)  | 0.0029  |
|                                                | College             | 7.7 (5.3, 10.2)  | 2.2 (1.0, 3.4)  | 0.0002 | 5.4 (2.1, 9.1)    | 3.1 (1.5, 4.7)  | 0.1417  |
| Region                                         | East                | 10.2 (6.4, 14.3) | 2.5 (0.8, 4.3)  | 0.0010 | 7.2 (1.2, 14.6)   | 4.6 (2.8, 6.3)  | 0.2436  |
|                                                | South               | 7.8 (4.6, 11.0)  | 0.1 (-2.5, 2.6) | 0.0013 | 17.6 (7.3, 30.6)  | 7.4 (3.2, 12.3) | 0.0723  |
|                                                | North               | 3.3 (0.5, 6.3)   | 3.3 (1.7, 5.0)  | 0.4878 | 9.4 (4.5, 15.2)   | 1.3 (-1.0, 3.4) | 0.0018  |
|                                                | Central             | 2.5 (-2.0, 7.7)  | 5.7 (3.3, 8.0)  | 0.1367 | 11.5 (4.4, 20.1)  | 3.3 (0.8, 6.0)  | 0.0338  |
|                                                | Northeast           | 8.4 (4.7, 12.6)  | 3.8 (2.2, 5.5)  | 0.0288 | 6.8 (3.3, 10.7)   | 3.7 (1.7, 5.7)  | 0.0986  |
|                                                | Southwest           | 12.8 (8.4, 17.4) | 2.8 (0.4, 5.3)  | 0.0007 | 20.1 (15.1, 25.6) | 3.9 (1.5, 6.5)  | <0.0001 |
|                                                | Northwest           | 8.7 (0.0, 20.8)  | 0.4 (-2.5, 3.4) | 0.0590 | 11.8 (5.0, 20.4)  | 3.2 (1.0, 5.3)  | 0.0097  |
| Occupation                                     | Agriculture related | 11.8 (7.0, 17.2) | 3.3 (1.1, 5.6)  | 0.0032 | 11.8 (8.1, 15.9)  | 4.2 (3.0, 5.5)  | 0.0002  |
|                                                | Other manual work   | 8.0 (4.5, 12.0)  | 1.7 (-0.6, 3.9) | 0.0042 | 9.4 (5.0, 14.5)   | 3.7 (1.7, 5.6)  | 0.0187  |
|                                                | Non-manual work     | 6.7 (4.7, 8.8)   | 2.4 (1.3, 3.6)  | 0.0008 | 4.4 (1.3, 7.9)    | 3.2 (1.8, 4.6)  | 0.2687  |
|                                                | Not working         | 6.0 (1.3, 11.3)  | 3.2 (0.5, 6.0)  | 0.2016 | 4.1 (-1.7, 10.4)  | 1.9 (-1.8, 5.7) | 0.3097  |
|                                                | Retired             | 5.7 (3.1, 8.6)   | 0.6 (-0.8, 1.9) | 0.0006 | 4.6 (-0.6, 10.8)  | 0.7 (-1.9, 3.3) | 0.1278  |

\* p-value for difference in annual changes for 2004-2010 versus 2010-2018.

**Appendix Table 2.** Continued.

| % change (&95%CI) in<br>overweight prevalence |                     | Urban women      |                  |        | Rural women        |                  |         |
|-----------------------------------------------|---------------------|------------------|------------------|--------|--------------------|------------------|---------|
|                                               |                     | 2004-2010        | 2010-2018        | p*     | 2004-2010          | 2010-2018        | p*      |
| Age group                                     | 18-29 years         | 6.5 (1.4, 12.4)  | 4.5 (1.7, 7.4)   | 0.2875 | 5.7 (0.7, 11.5)    | 4.6 (2.2, 7.1)   | 0.3887  |
|                                               | 30-39 years         | 6.3 (3.7, 8.9)   | 1.3 (-0.3, 3.0)  | 0.0041 | 4.4 (1.4, 7.6)     | 2.5 (1.0, 4.1)   | 0.1857  |
|                                               | 40-49 years         | 3.4 (0.8, 6.1)   | 0.0 (-1.4, 1.5)  | 0.0343 | 3.9 (1.5, 6.5)     | 1.9 (0.9, 2.9)   | 0.0932  |
|                                               | 50-59 years         | 2.5 (0.2, 4.8)   | 0.1 (-1.1, 1.3)  | 0.0700 | 3.6 (1.1, 6.3)     | 2.2 (1.0, 3.4)   | 0.2024  |
|                                               | 60-69 years         | 2.5 (0.3, 4.8)   | -0.6 (-1.6, 0.5) | 0.0160 | 5.5 (1.8, 9.7)     | 1.6 (0.3, 3.1)   | 0.0474  |
| Education                                     | No education        | 4.4 (1.8, 7.1)   | 1.8 (0.2, 3.4)   | 0.0906 | 7.0 (3.7, 10.7)    | 2.7 (1.6, 3.9)   | 0.0154  |
|                                               | Primary             | 6.2 (2.7, 10.1)  | 0.9 (-0.5, 2.4)  | 0.0074 | 5.3 (2.2, 8.7)     | 3.2 (1.9, 4.5)   | 0.1507  |
|                                               | Secondary           | 4.0 (0.8, 7.5)   | 2.5 (1.1, 4.0)   | 0.2415 | 4.0 (0.8, 7.5)     | 3.0 (1.6, 4.4)   | 0.3126  |
|                                               | College             | 5.6 (2.3, 9.1)   | 0.7 (-1.2, 2.6)  | 0.0172 | -1.1 (-5.1, 3.2)   | 2.4 (0.0, 4.9)   | 0.1130  |
| Region                                        | East                | 5.3 (2.3, 8.3)   | 1.7 (-0.3, 3.7)  | 0.0572 | 4.6 (-1.7, 12.3)   | 3.6 (1.1, 6.1)   | 0.4132  |
|                                               | South               | 1.1 (-2.1, 4.2)  | 0.1 (-2.6, 3.0)  | 0.3532 | 5.7 (-3.2, 18.3)   | 5.4 (2.9, 8.0)   | 0.4762  |
|                                               | North               | 2.4 (-1.8, 7.2)  | 0.4 (-2.0, 2.7)  | 0.2441 | 4.5 (0.8, 8.6)     | -0.3 (-2.2, 1.6) | 0.0244  |
|                                               | Central             | 2.3 (-1.9, 6.3)  | 0.9 (-2.8, 4.6)  | 0.3406 | 5.1 (-0.6, 12.0)   | 2.0 (-0.1, 4.3)  | 0.2050  |
|                                               | Northeast           | 8.5 (2.3, 16.5)  | 1.5 (-0.3, 3.2)  | 0.0216 | 2.5 (0.0, 5.1)     | 3.3 (1.9, 4.9)   | 0.3229  |
|                                               | Southwest           | 7.9 (4.9, 10.9)  | 2.2 (0.4, 4.1)   | 0.0061 | 11.2 (4.8, 18.6)   | 3.8 (1.1, 6.8)   | 0.0438  |
|                                               | Northwest           | -2.1 (-7.1, 3.3) | -0.5 (-3.3, 2.6) | 0.3394 | 8.5 (2.6, 15.6)    | 1.7 (-0.5, 4.1)  | 0.0342  |
| Occupation                                    | Agriculture related | 7.9 (3.7, 12.7)  | 2.4 (0.5, 4.3)   | 0.0186 | 6.7 (3.6, 9.9)     | 3.1 (2.0, 4.3)   | 0.0277  |
|                                               | Other manual work   | 5.4 (-0.6, 11.9) | 3.2 (-0.4, 7.1)  | 0.3081 | 5.0 (-4.4, 16.4)   | 6.7 (2.2, 11.9)  | 0.3926  |
|                                               | Non-manual work     | 7.6 (4.3, 11.1)  | 1.3 (-0.3, 3.0)  | 0.0024 | 4.7 (1.5, 8.1)     | 2.0 (0.5, 3.5)   | 0.0991  |
|                                               | Not working         | 0.4 (-3.5, 4.7)  | 1.7 (-1.0, 4.4)  | 0.3341 | -9.7 (-14.9, -4.4) | 9.3 (5.2, 13.9)  | <0.0001 |
|                                               | Retired             | 2.3 (0.2, 4.5)   | -0.7 (-2.2, 0.7) | 0.0303 | 1.3 (-2.5, 5.2)    | 0.1 (-2.9, 3.1)  | 0.3423  |

\* p-value for difference in annual changes for 2004-2010 versus 2010-2018.

**Appendix Table 3. Standardised prevalence of obesity and overweight defined by Chinese BMI cut-offs (obesity: BMI  $\geq 28$  and overweight:  $\geq 24$  kg/m<sup>2</sup>).**

|                                                   | 2004              | 2007              | 2010              | 2013              | 2015              | 2018              |
|---------------------------------------------------|-------------------|-------------------|-------------------|-------------------|-------------------|-------------------|
| <b>Men</b>                                        |                   |                   |                   |                   |                   |                   |
| <b>Prevalence (&amp; 95%CI) of obesity (%)</b>    |                   |                   |                   |                   |                   |                   |
| Overall                                           | 6.1 (5.1, 7.0)    | 6.8 (5.9, 7.7)    | 12.3 (11.3, 13.3) | 14.4 (13.5, 15.3) | 15.1 (14.0, 16.3) | 18.8 (17.6, 20.0) |
| Urban                                             | 7.2 (5.7, 8.7)    | 8.0 (6.5, 9.6)    | 14.6 (13.1, 16.2) | 15.4 (14.1, 16.7) | 16.0 (14.3, 17.7) | 21.4 (19.3, 23.5) |
| Rural                                             | 5.4 (4.2, 6.6)    | 6.0 (5.1, 7.0)    | 10.9 (9.7, 12.1)  | 13.8 (12.7, 15.0) | 14.5 (12.9, 16.1) | 16.7 (15.3, 18.0) |
| <b>Prevalence (&amp; 95%CI) of overweight (%)</b> |                   |                   |                   |                   |                   |                   |
| Overall                                           | 29.1 (26.3, 31.9) | 34.5 (32.1, 36.9) | 44.3 (42.3, 46.2) | 48.6 (47.0, 50.1) | 50.7 (48.8, 52.6) | 55.2 (53.4, 56.9) |
| Urban                                             | 35.7 (32.0, 39.4) | 39.7 (36.0, 43.3) | 49.9 (47.2, 52.6) | 51.4 (49.3, 53.5) | 52.9 (49.7, 56.1) | 58.6 (55.6, 61.5) |
| Rural                                             | 25.2 (21.6, 28.7) | 31.4 (28.5, 34.3) | 40.9 (38.6, 43.3) | 46.9 (44.8, 49.0) | 49.1 (46.7, 51.6) | 52.3 (50.2, 54.5) |
| <b>Women</b>                                      |                   |                   |                   |                   |                   |                   |
| <b>Prevalence (&amp; 95%CI) of obesity (%)</b>    |                   |                   |                   |                   |                   |                   |
| Overall                                           | 8.2 (6.9, 9.6)    | 8.9 (7.8, 9.9)    | 11.7 (10.8, 12.7) | 14.0 (13.2, 14.9) | 13.3 (12.4, 14.2) | 14.8 (13.9, 15.8) |
| Urban                                             | 8.6 (6.5, 10.6)   | 8.9 (7.5, 10.2)   | 12.4 (11.1, 13.8) | 13.3 (12.0, 14.6) | 12.4 (11.1, 13.7) | 13.9 (12.4, 15.3) |
| Rural                                             | 8.0 (6.2, 9.8)    | 8.9 (7.4, 10.3)   | 11.3 (10.1, 12.5) | 14.4 (13.3, 15.6) | 14.0 (12.8, 15.2) | 15.6 (14.3, 16.9) |
| <b>Prevalence (&amp; 95%CI) of overweight (%)</b> |                   |                   |                   |                   |                   |                   |
| Overall                                           | 33.1 (30.3, 35.9) | 34.7 (32.3, 37.1) | 41.0 (39.2, 42.9) | 45.1 (43.4, 46.8) | 44.7 (43.0, 46.4) | 47.1 (45.4, 48.8) |
| Urban                                             | 33.5 (30.3, 36.8) | 35.0 (32.2, 37.8) | 41.6 (39.0, 44.2) | 43.6 (40.9, 46.3) | 41.8 (39.4, 44.1) | 43.9 (41.3, 46.5) |
| Rural                                             | 32.8 (28.8, 36.8) | 34.5 (31.1, 37.9) | 40.7 (38.2, 43.2) | 46.0 (43.9, 48.1) | 46.8 (44.6, 49.0) | 49.8 (47.7, 51.8) |
| <b>Both</b>                                       |                   |                   |                   |                   |                   |                   |
| <b>Prevalence (&amp; 95%CI) of obesity (%)</b>    |                   |                   |                   |                   |                   |                   |
| Overall                                           | 7.1 (6.0, 8.2)    | 7.8 (7.0, 8.7)    | 12.0 (11.1, 12.9) | 14.2 (13.4, 15.0) | 14.2 (13.3, 15.2) | 16.8 (15.9, 17.8) |
| Urban                                             | 7.9 (6.2, 9.5)    | 8.4 (7.1, 9.8)    | 13.6 (12.2, 14.9) | 14.4 (13.2, 15.6) | 14.2 (12.8, 15.6) | 17.7 (16.1, 19.2) |
| Rural                                             | 6.7 (5.2, 8.1)    | 7.4 (6.4, 8.5)    | 11.1 (10.0, 12.2) | 14.1 (13.1, 15.2) | 14.3 (12.9, 15.6) | 16.1 (15.0, 17.3) |
| <b>Prevalence (&amp; 95%CI) of overweight (%)</b> |                   |                   |                   |                   |                   |                   |
| Overall                                           | 31.1 (28.4, 33.7) | 34.6 (32.4, 36.8) | 42.7 (40.9, 44.4) | 46.9 (45.4, 48.4) | 47.7 (46.1, 49.4) | 51.2 (49.7, 52.7) |
| Urban                                             | 34.7 (31.5, 37.8) | 37.4 (34.5, 40.2) | 45.8 (43.4, 48.3) | 47.6 (45.3, 49.8) | 47.4 (44.9, 50.0) | 51.3 (48.9, 53.7) |
| Rural                                             | 28.9 (25.3, 32.6) | 32.9 (30.0, 35.9) | 40.8 (38.6, 43.1) | 46.5 (44.5, 48.5) | 48.0 (45.8, 50.1) | 51.0 (49.2, 52.9) |



**Appendix Table 4. Annual change in standardised prevalence of obesity and overweight defined by Chinese BMI cut-offs (obesity: BMI  $\geq$ 28 and overweight:  $\geq$ 24 kg/m<sup>2</sup>) in 2004-2010 and in 2010-2018.**

|                                                        | Men              |                |         | Women           |                 |        | Both            |                |        |
|--------------------------------------------------------|------------------|----------------|---------|-----------------|-----------------|--------|-----------------|----------------|--------|
|                                                        | 2004-2010        | 2010-2018      | p*      | 2004-2010       | 2010-2018       | p*     | 2004-2010       | 2010-2018      | p*     |
| <b>% change (&amp; 95%CI) in obesity prevalence</b>    |                  |                |         |                 |                 |        |                 |                |        |
| Overall                                                | 12.5 (9.3, 16.0) | 5.5 (4.2, 6.9) | 0.0002  | 6.2 (3.1, 9.6)  | 3.0 (1.7, 4.3)  | 0.0496 | 9.1 (6.1, 12.4) | 4.3 (3.1, 5.6) | 0.0045 |
| Urban                                                  | 12.6 (8.4, 17.3) | 4.9 (3.0, 6.8) | 0.0015  | 6.5 (2.1, 11.4) | 1.4 (-0.5, 3.3) | 0.0312 | 9.6 (5.6, 14.0) | 3.4 (1.7, 5.1) | 0.0072 |
| Rural                                                  | 12.6 (8.0, 17.6) | 5.5 (3.7, 7.3) | 0.0054  | 6.1 (1.8, 10.8) | 4.1 (2.4, 5.9)  | 0.2366 | 8.9 (4.8, 13.6) | 4.8 (3.2, 6.4) | 0.0536 |
| <b>% change (&amp; 95%CI) in overweight prevalence</b> |                  |                |         |                 |                 |        |                 |                |        |
| Overall                                                | 7.3 (5.4, 9.2)   | 2.8 (2.1, 3.5) | <0.0001 | 3.7 (2.1, 5.4)  | 1.7 (1.0, 2.5)  | 0.0299 | 5.5 (3.8, 7.2)  | 2.3 (1.7, 2.9) | 0.0006 |
| Urban                                                  | 5.8 (3.8, 7.9)   | 2.0 (1.1, 3.0) | 0.0014  | 3.7 (1.7, 5.7)  | 0.7 (-0.4, 1.8) | 0.0126 | 4.8 (3.0, 6.7)  | 1.4 (0.5, 2.3) | 0.0022 |
| Rural                                                  | 8.5 (5.8, 11.4)  | 3.1 (2.2, 4.0) | 0.0001  | 3.7 (1.4, 6.2)  | 2.6 (1.6, 3.5)  | 0.2132 | 5.9 (3.6, 8.5)  | 2.8 (2.0, 3.7) | 0.0142 |

\* p-value for difference in annual changes for 2004-2010 versus 2010-2018.
